1  
2  
3  
4  
5  
6  
7  
8  
9  
10  
11  
12  
13  
14  
15  
16  
17  
18  
19  
20  
21  
22  
23  
24  
25

## **Transcription factor RFX7 governs a tumor suppressor network in response to p53 and stress**

Luis Coronel<sup>1</sup>, Konstantin Riege<sup>1</sup>, Katjana Schwab<sup>1</sup>, Silke Förste<sup>1</sup>, David Häckes<sup>1</sup>, Lena Semerau<sup>1</sup>, Stephan H. Bernhart<sup>2</sup>, Reiner Siebert<sup>3</sup>, Steve Hoffmann<sup>1,\*</sup>, Martin Fischer<sup>1,\*</sup>

<sup>1</sup> Computational Biology Group, Leibniz Institute on Aging – Fritz Lipmann Institute (FLI), Beutenbergstraße 11, 07745 Jena, Germany

<sup>2</sup> Transcriptome Bioinformatics Group, Department of Computer Science and Interdisciplinary Center for Bioinformatics, Leipzig University, Härtelstraße 16-18, 04107 Leipzig, Germany

<sup>3</sup> Institute of Human Genetics, Ulm University and Ulm University Medical Center, Albert-Einstein-Allee 23, 89081 Ulm, Germany

Running title: p53 employs RFX7

\*To whom correspondence should be addressed. Email: [Martin.Fischer@leibniz-fli.de](mailto:Martin.Fischer@leibniz-fli.de), [Steve.Hoffmann@leibniz-fli.de](mailto:Steve.Hoffmann@leibniz-fli.de)

### **Keywords**

RFX7, p53, tumor suppressor, gene regulation, apoptosis

## 26 **Abstract**

27           Despite its prominence, the mechanisms through which the tumor suppressor p53  
28 regulates most genes remain unclear. Recently, the regulatory factor X 7 (RFX7) emerged as  
29 a suppressor of lymphoid neoplasms, but its regulation and target genes mediating tumor  
30 suppression remain unknown. Here, we identify a novel p53-RFX7 signaling axis. Integrative  
31 analysis of the RFX7 DNA binding landscape and the RFX7-regulated transcriptome in three  
32 distinct cell systems reveals that RFX7 directly controls multiple established tumor  
33 suppressors, including PDCD4, PIK3IP1, MXD4, and PNRC1, across cell types and is the  
34 missing link for their activation in response to p53 and stress. RFX7 target gene expression  
35 correlates with cell differentiation and better prognosis in numerous cancer types. Interestingly,  
36 we find that RFX7 sensitizes cells to Doxorubicin by promoting apoptosis. Together, our work  
37 establishes RFX7's role as a ubiquitous regulator of cell growth and fate determination and a  
38 key node in the p53 transcriptional program.

39

## 40 **Introduction**

41

42           RFX7 belongs to a family of eight transcription factors that share a highly conserved  
43 DNA-binding domain (DBD) through which they can bind to *cis*-regulatory X-box motifs (1, 2).  
44 *RFX5* is the closest sibling of *RFX7*, and while the expression of most *RFX* genes is restricted  
45 to specific cell types, *RFX1*, *RFX5*, and *RFX7* display ubiquitous expression (2, 3). Whole-  
46 genome sequencing efforts led us and others to discover *RFX7* mutations in 13 to 15 % of  
47 Epstein-Barr Virus-negative Burkitt lymphoma patients (4, 5). Additionally, genome-wide  
48 association studies linked *RFX7* to chronic lymphocytic leukemia (6–8). *RFX7* alterations have  
49 also been identified in diffuse large B cell lymphoma (9), acute myeloid leukemia (10), as well  
50 as in mouse models of lymphoma (9, 11) and leukemia (12). In addition to hematopoietic  
51 neoplasms, *RFX7* has been associated with body fat distribution (13), Alzheimer's disease  
52 (14), and autism spectrum disorder (15), suggesting that RFX7 may function in various cell  
53 types and tissues. While human RFX7 is functionally uncharacterized, first insights from animal

54 models identified Rfx7 to play a role in anuran neural development (16) and maturation and  
55 metabolism in murine lymphoid cells (17). Importantly, the regulation of RFX7 and its target  
56 genes mediating tumor suppression are unknown.

57 In response to stress conditions, p53 transcriptionally regulates a plethora of target  
58 genes to suppress tumorigenesis (18, 19). Thereby, p53 influences diverse cellular processes,  
59 including apoptosis, cell cycle progression, and metabolism. Using integrative omics  
60 approaches, we started to disentangle the p53 gene regulatory network (GRN) into  
61 subnetworks of genes controlled directly by p53 or indirectly through downstream transcription  
62 factors (20). For example, p53 regulates the largest subset of genes indirectly through its direct  
63 target gene *CDKN1A*, encoding cyclin-dependent kinase inhibitor p21 and reactivating  
64 DREAM and RB:E2F *trans*-repressor complexes to down-regulate cell cycle genes (20–23).  
65 However, complex cross-talks between signaling pathways impede the identification of indirect  
66 regulations. Uncovering the molecular mechanisms through which p53 indirectly controls most  
67 p53-regulated genes, therefore, remains a longstanding challenge (19).

68 Our findings place the understudied transcription factor RFX7 immediately downstream  
69 of p53 and provide compelling evidence for RFX7's ubiquitous role in governing growth  
70 regulatory pathways. We reveal that RFX7 orchestrates multiple established tumor suppressor  
71 genes in response to cellular stress. Thus, RFX7 emerges as a crucial regulatory arm of the  
72 p53 tumor suppressor. In the context of cancer biology, the general importance of this new  
73 signaling axis is exemplified by the better prognosis of patients with a medium to high  
74 expression of RFX7 targets across the TCGA pan-cancer cohort, which indicates recurrent de-  
75 regulation of RFX7 signaling in cancer.

76

## 77 **Materials & Methods**

78

### 79 *Cell culture, drug treatment, and transfection*

80 U2OS and HCT116 cells (ATCC, Manassas, Virginia, USA) were grown in high glucose  
81 Dulbecco's modified Eagle's media (DMEM) with pyruvate (Thermo Fisher Scientific,  
82 Darmstadt, Germany). RPE-1 hTERT cells (ATCC) were cultured in DMEM:F12 media  
83 (Thermo Fisher Scientific). Culture media were supplemented with 10% fetal bovine serum

84 (FBS; Thermo Fisher Scientific) and penicillin/streptomycin (Thermo Fisher Scientific). Cell  
85 lines were tested twice a year for *Mycoplasma* contamination using the LookOut Detection Kit  
86 (Sigma), and all tests were negative.

87 Cells were treated with DMSO (0.15 %; Carl Roth, Karlsruhe, Germany), Nutlin-3a  
88 (10  $\mu$ M; Sigma Aldrich, Darmstadt, Germany), Actinomycin D (5 nM; Cayman Chemicals, Ann  
89 Arbor, Michigan, USA), or Doxorubicin (1  $\mu$ M or as indicated; Cayman Chemicals) for 24 h.  
90 For knockdown experiments, cells were seeded in 6-well plates or 6 cm dishes and reverse  
91 transfected with 5 nM Silencer Select siRNAs (Thermo Fisher Scientific) using RNAiMAX  
92 (Thermo Fisher Scientific) and Opti-MEM (Thermo Fisher Scientific) following the manufacturer  
93 protocol.

94 Images of cells were taken using an Evos M5000 microscope (Thermo Fisher  
95 Scientific) or a ChemiDoc MP documentation system (Bio-Rad, Feldkirchen, Germany).

96

97 *Chromatin immunoprecipitation, RNA extraction, and reverse transcription semi-quantitative*  
98 *real-time PCR (RT-qPCR)*

99 ChIP was performed with the SimpleChIP Kit (Cell Signaling Technology, Danvers, MA,  
100 USA) following the manufacturer instructions. 3  $\mu$ g of p53 (kind gift from Dr. Bernhard Schlott  
101 (24)) or RFX7 (#A303-062A Bethyl Laboratories, Montgomery, TX, USA) antibody were used  
102 per IP. Sonication was performed on a Bioruptor Plus (Diagenode, Seraing, Belgium).

103 Total cellular RNA was extracted using the RNeasy Plus Mini Kit (Qiagen, Hilden,  
104 Germany) following the manufacturer protocol. One-step reverse transcription and real-time  
105 PCR was performed with a Quantstudio 5 (Thermo Fisher Scientific) using Power SYBR Green  
106 RNA-to-CT 1-Step Kit (Thermo Fisher Scientific) following the manufacturer protocol. We  
107 identified *ACTR10* as a suitable control gene that is not regulated by p53 but expressed across  
108 20 gene expression profiling datasets (20). Generally, two or three biological replicates with  
109 three technical replicates each were used. Given the nature of the technical setup, a few  
110 individual data points were erroneous and, thus, excluded (see source data).

111 Primer sequences are listed in Supplementary Table 4.

112

113 *Western blot analysis*

114 Cells were lysed in RIPA buffer (Thermo Fisher Scientific) containing protease and  
115 phosphatase inhibitor cocktail (Roche, Grenzach-Wyhlen, Germany or Thermo Fisher  
116 Scientific). Protein lysates were scraped against Eppendorf rack for 20 times and centrifuged  
117 with 15000 rpm for 15 min at 4°C. The protein concentration of supernatant lysates was  
118 determined using the Pierce 660 nm Protein Assay Kit (Thermo Fisher Scientific) and a  
119 NanoDrop1000 Spectrophotometer (Thermo Fisher Scientific). Proteins were separated in a  
120 Mini-Protean TGX Stain-Free Precast 4-15% Gel (Bio-Rad) using Tris/Glycine/SDS running

121 buffer (Bio-Rad). Proteins were transferred to a 0.2  $\mu\text{m}$  polyvinylidene difluoride (PVDF)  
122 transfer membrane either using a Trans-Blot Turbo Mini Transfer Pack (Bio-Rad) in a Trans-  
123 Blot Turbo (Bio-Rad) or using a Mini Trans-Blot Cell (Bio-Rad) in a Mini-Protean Tetra Cell  
124 (Bio-Rad). Following antibody incubation, membranes were developed using Clarity Max ECL  
125 (Bio-Rad) and a ChemiDoc MP imaging system (Bio-Rad).

126       Antibodies and their working concentrations are listed in Supplementary Table 4.

127

#### 128 *Pre-processing of Illumina sequencing data*

129       Quantification and quality check of libraries were performed using the Agilent  
130 Bioanalyzer 2100 in combination with the DNA 7500 Kit. Libraries were pooled and sequenced  
131 on a NextSeq 500 (75 bp, single-end), HiSeq 2500 (50 bp, single-end), and NovaSeq 6000  
132 (S1 or SP, 100 cycles). Sequence information was extracted in FastQ format using Illumina's  
133 bcl2FastQ v2.19.1.403 or v2.20.0.422.

134       We utilized Trimmomatic (25) v0.39 (5nt sliding window approach, mean quality cutoff  
135 22) for read quality trimming according to inspections made from FastQC  
136 (<https://www.bioinformatics.babraham.ac.uk/projects/fastqc/>) v0.11.9 reports. Illumina  
137 universal adapter as well as mono- and di-nucleotide content was clipped using Cutadapt v2.10  
138 (26). Potential sequencing errors were detected and corrected using Rcorrector v1.0.3.1 (27).  
139 Ribosomal RNA (rRNA) transcripts were artificially depleted by read alignment against rRNA  
140 databases through SortMeRNA v2.1 (28). The preprocessed data was aligned to the reference  
141 genome hg38, retrieved along with its gene annotation from Ensembl v.92 (29), using the  
142 mapping software segemehl (30, 31) v0.3.4 with adjusted accuracy (95%) and split-read option  
143 enabled (RNA-seq) or disabled (ChIP-seq). Mappings were filtered by Samtools v1.10 (32) for  
144 uniqueness and properly aligned mate pairs. We removed duplicated reads with Picard  
145 MarkDuplicates v2.23.4.

146

#### 147 *ChIP-seq and analysis*

148       ChIP was performed as described above in biological duplicates for RFX7 ChIP and  
149 input DNA from Nutlin-3a and DMSO control treated U2OS, HCT116, and RPE-1 cells.  
150 Libraries were constructed using the NEBNext Ultra II DNA Library Preparation Kit (New  
151 England Biolabs, Frankfurt am Main, Germany) following the manufacturer's description.  
152 Following pre-processing of the sequencing data (see above), biological replicates of each  
153 input and IP were pooled prior to peak calling with MACS2 v2.2.7.1 (33) with q-value cutoff  
154 0.05. MACS2 was executed in both available modes utilizing either the learned or a customized  
155 shifting model parameterized according to the assumed mean fragment length of 150bp as  
156 extension size. The resulting peak sets were merged by overlap with BEDTools v2.29.2 (34).  
157 Per interval, the strongest enrichment signal under the associated peak summits as well as

158 the lowest p-value and q-value was kept. ENCODE blacklist regions (35) were filtered out.  
159 Unique and shared overlapping peak sets were identified using BEDTools 'intersect'. *De novo*  
160 motif discovery was performed using 'findMotifsGenome' of HOMER v4.10 (36) with options -  
161 *size given -S 15*. The top X-box motif recovered from the *de novo* analysis of the 120 overlap  
162 peaks with relaxed log odds detection threshold of 7 was used to discover X-boxes across  
163 hg38 using HOMER's 'scanMotifGenomeWide'. Conservation plots displaying the average  
164 vertebrate PhastCons score (37) were generated using the Conservation Plot tool in Cistrome  
165 (38). The Cis-regulatory Element Annotation System (CEAS) tool in Cistrome (38) was used  
166 to identify the enrichment of binding sites at genome features. Genes associated with RFX7  
167 peaks were identified using BETA-minus in Cistrome (38) with a threshold of 5 kb from the  
168 TSS. To identify whether RFX7 functions as an activator or repressor of gene transcription, we  
169 employed BETA analysis (39) in Cistrome (38). CistromeDB toolkit (40) was used to identify  
170 TFs that display ChIP-seq peak sets (top 10k peaks) that are significantly similar to the set of  
171 120 common RFX7 peaks. Bigwig tracks were generated using deeptools 'bamCoverage' with  
172 options *-binSize 1* and *-extendReads 150* (41).

173 Publicly available p53 ChIP-seq data from Nutlin-3a-treated U2OS (42) and HCT116  
174 (43) cells was obtained from CistromeDB (40). Ten publicly available RFX5 ChIP-seq datasets  
175 from A549, GM12878, HepG2, hESC, IMR90, K562, MCF-7, HeLa, and SK-N-SH cells were  
176 obtained from CistromeDB and joined using BEDTools 'multiinter' followed by 'merge'. RFX5  
177 peaks supported by at least 5 out of the 10 datasets were kept for further analyses.

#### 178 179 *RNA-seq and analysis*

180 Cellular RNA was obtained as described above in biological triplicates or quadruplets.  
181 Quality check and quantification of total RNA were performed using the Agilent Bioanalyzer  
182 2100 in combination with the RNA 6000 Nano Kit (Agilent Technologies). Libraries were  
183 constructed from 1  $\mu$ g of total RNA using Illumina's TruSeq stranded mRNA Library  
184 Preparation Kit or from 500 ng total RNA using NEBNext Ultra II RNA - polyA+ (mRNA) Library  
185 Preparation Kit (New England Biolabs) following the manufacturer's description.

186 Following pre-processing of the data (see above), read quantification was performed  
187 on exon level using featureCounts v1.6.5 (44), parametrized according to the strand specificity  
188 inferred through RSeQC v3.0.0 (45). Differential gene expression and its statistical significance  
189 was identified using DESeq2 v1.20.0 (46). Given that all RNA-seq data was derived from  
190 PolyA-enriched samples, we only included Ensembl transcript types 'protein\_coding',  
191 'antisense', 'lncRNA', and 'TEC' in our analysis. Common thresholds for  $|\log_2(\text{fold-change})| \geq$   
192 0.25 and adj. p-value  $< 0.01$  were applied to detect significant differential expression. Publicly  
193 available RNA-seq data from human p53-negative HL-60 promyelocytes differentiating into  
194 macrophages or neutrophils was obtained from GEO accession number GSE79044 (47).



195 Publicly available RNA-seq data from of human umbilical cord blood-derived unrestricted  
196 somatic stem cells (USSC) differentiating into neuronal-like cells was obtained from GEO  
197 accession number GSE96642 (48). Publicly available RNA-seq data from human pluripotent  
198 stem cells differentiating into lung alveolar cells was obtained from GEO accession number  
199 GSE96642 (49). RNA-seq data from human cells were processed as described above. Publicly  
200 available RNA-seq data from conditional Rfx7 knock-out mice was obtained from GEO  
201 accession number GSE113267 (17). The mouse RNA-seq data was processed as described  
202 above, but aligned to the mouse reference genome mm10. Given the naturally larger variation  
203 in tissue samples, thresholds for  $|\log_2(\text{fold-change})| \geq 0.25$  and adj. p-value  $\leq 0.05$  were applied  
204 to detect significant differential expression.

205

#### 206 *p53 Expression Score*

207 The *p53 Expression Score* has been published in a previous meta-analysis (20) and  
208 reflects a summary of p53-dependent gene expression from 20 genome-wide p53-dependent  
209 gene expression profiling datasets. In each dataset a gene was identified either as significantly  
210 down-regulated (score -1), significantly up-regulated (score +1), or not significantly regulated  
211 (score 0) by p53. The *p53 Expression Score* displays for each gene the sum of the scores from  
212 all 20 datasets in the meta-analysis.

213

#### 214 *Transcription factor binding and motif enrichment analysis*

215 We used iRegulon (50) to identify transcription factors and motifs that are enriched  
216 within 500 bp upstream of the TSS or within 10 kb around the TSS of selected genes.

217

#### 218 *Cell viability data from the Cancer Dependency Map (DepMap) project*

219 The DepMap project pursued a systematic knockdown of genes in a large panel of  
220 cancer cell lines to identify genes that are essential for cancer cell viability (51). RFX7 data  
221 was available for 343 cell lines in which RFX7 was depleted by RNAi (depmap.org). The  
222 DEMETER2 score is a dependency score that reflects the effect of a given knockdown on cell  
223 viability (52). Negative dependency scores reflect decreased cell viability upon loss of the  
224 target gene, while positive scores indicate increased cell viability.

225

#### 226 *Cell proliferation and viability assay*

227 U2OS and HCT116 were transfected with 5 nM of respective siRNAs using RNAiMAX.  
228 The next day, cells were seeded in 96-well plates (9 000 cells per well). After 24h of  
229 transfection, cells were treated with Doxorubicin or DMSO control for 24h. Subsequently, the  
230 cells recovered for 6 days in fresh drug-free media. WST-1 reagent (Sigma Aldrich) was added

231 for 4 h following the manufacturer protocol before absorbance was measured at 440 nm on a  
232 M1000pro microplate reader (Tecan, Männedorf, Switzerland).

233

#### 234 *Clonogenic assay*

235 HCT116 cells were transfected with 5 nM of respective siRNAs using RNAiMAX. The  
236 next day, the transfected cells were seeded 6-well plates (50 000 cells per well) containing 2  
237 ml of culture media. After 24h transfection, cells were challenged with either DMSO or treated  
238 with different Doxorubicin concentrations (0.05  $\mu$ M, 0.075  $\mu$ M, 0.1  $\mu$ M, 0.15  $\mu$ M and 0.2  $\mu$ M for  
239 24 hrs. All plates were then recovered in drug-free media and growth continued for another 7  
240 days. After 7 days of recovery, cells were stained with crystal violet containing glutaraldehyde  
241 solution and briefly rinsed with plain water.

242

#### 243 *Annexin V assay*

244 HCT116 cells were transfected with 5 nM of respective siRNAs using RNAiMAX. The  
245 next day, the transfected cells were seeded 6-well plates (50 000 cells per well) containing 2  
246 ml of culture media. After 24h transfection, cells were challenged with either DMSO or treated  
247 with different Doxorubicin concentrations (0.05  $\mu$ M, 0.075  $\mu$ M, 0.1  $\mu$ M, 0.15  $\mu$ M and 0.2  $\mu$ M for  
248 24 hrs. All plates were then recovered in drug-free media and growth continued for another 6  
249 days. Cells were stained with Annexin V and PI using the Annexin V Apoptosis Detection Kit I  
250 (BD Biosciences, San Jose, CA, USA) following the manufacturer instructions. Cell staining  
251 was quantified through flow cytometry on a BD FACSAria Fusion (BD Biosciences) and flow  
252 cytometry data was analyzed using FACSDiva 9.0.1 (BD Biosciences).

253

#### 254 *Survival analysis*

255 Survival analyses for Cancer Genome Atlas (TCGA) cases were based on the  
256 expression of a set of 19 direct RFX7 targets. Specifically, genes in this set were required to  
257 have been identified in all three cell line models (Fig. 2a, Extended Data Fig. 2a) and to have  
258 a *p53 Expression Score* > 5 to avoid the inclusion of cell cycle genes and to filter for a  
259 reproducibly strong p53-RFX7 signaling response. This 19-gene-set comprises *TP53INP1*,  
260 *PNRC1*, *MXD4*, *PIK3IP1*, *TOB1*, *PIK3R3*, *SESN3*, *YPEL2*, *PLCXD2*, *SLC43A2*, *CCND1*,  
261 *IP6K2*, *TSPYL2*, *RFX5*, *PDCD4*, *CCNG2*, *ABAT*, *TSPYL1*, and *JUNB*. We retrieved clinical  
262 data and FPKM normalized gene expression values from TCGA using the R package  
263 TCGAbiolinks v2.18.0 (53). For the whole pan-cancer set and for each of the 33 cancer types  
264 we calculated single-sample expression scores for the 19-gene-set from FPKM transformed  
265 quantification data using the official GenePattern codebase v10.0.3 for single sample gene set  
266 enrichment analysis (ssGSEA; <https://github.com/GSEA-MSigDB/ssGSEA-gpmodule>) (54). A  
267 single-sample expression score measures the degree of coordinated up or down-regulation of



268 genes in the given set. Subsequently, we subdivided the expression scores into three equally  
269 sized categorical groups (high, medium, low). Kaplan-Meier plots and multivariate Cox  
270 regression analysis based on the expression groups were performed on clinical time to event  
271 and event occurrence information using the R survival package v3.2–3. The Cox proportional  
272 hazards (PH) model was used to investigate the relation of patient survival and categorical  
273 expression levels. To control for confounding factors, gender and age were included into all  
274 models. In case of the pan-cancer cohort, we further included cancer type into the regression  
275 analysis. The rates of occurrence of events over time were compared between the groups  
276 using the fitted PH model. Additionally, confounding factors, the distribution of gender, age,  
277 and cancer type were visualized for each categorical group.

278

### 279 *Statistics*

280 ChIP and RT-qPCR data was analyzed using a two-sided unpaired t-test. Cell viability  
281 data from WST-1 assays were analyzed using a Sidak-corrected two-way ANOVA test. Mean  
282 Z-scores were compared using a two-sided paired t-test. Violin plots display the median. Bar  
283 graphs display mean and standard deviation. \*, \*\*, \*\*\*, and n.s. indicate p-values <0.05, <0.01,  
284 <0.001, and >0.05, respectively. The number of replicates is indicated in each Figure legend.  
285 FDR from RNA-seq data were obtained from DESeq2 analysis ('padj' values). p-values from  
286 ChIP-seq data were obtained from MACS2 analysis. The experiments were not randomized  
287 and investigators were not blinded to allocation during experiments.

288

### 289 *Data availability*

290 Sequencing data is accessible through GEO (55) series accession numbers  
291 GSE162157, GSE162158, GSE162159, GSE162160, GSE162161, GSE162163. Previously  
292 published RNA-seq data was obtained from GEO accession numbers GSE113267 (17),  
293 GSE79044 (47), GSE144464 (48), and GSE96642 (49). Previously published p53 ChIP-seq  
294 data was obtained from CistromeDB (40) IDs 82544 (43) and 33077 (42). Similarly, previously  
295 published RFX5 ChIP-seq data (56) was obtained from CistromeDB IDs 45649, 45692, 45730,  
296 45823, 45863, 45893, 46037, 100232, 100233, 100797. Source data for Figures are available  
297 from the corresponding authors upon request.

298

299

## 300 **Results**

301

302 **The p53 target RFX7 mediates gene activation and markedly differs from RFX5**

303 To identify novel nodes in the p53 GRN, we performed an enrichment analysis for  
304 transcription factor binding to genes frequently up-regulated by p53 activation but not directly  
305 bound by p53. We focused on proximal promoters, as these are more likely to confer robust  
306 gene regulation across cell types. An analysis of publicly available ChIP-seq datasets revealed  
307 multiple hits indicating enriched RFX5 binding to the genes' proximal promoters (Figure 1A).  
308 Given that the RFX family shares a conserved DBD and ChIP-seq data is publicly available  
309 only for RFX1 and RFX5, we initially included all RFX family members in our investigation. To  
310 elucidate the potential role of RFX transcription factors in the p53 GRN, we analyzed published  
311 p53-dependent gene expression data (20). We identified *RFX5* and *RFX7*, but no other RFX  
312 family member, as being frequently up-regulated by p53 (Figure 1B). Investigation of published  
313 p53 DNA binding data revealed that *RFX7* contains two p53 binding sites in the first intron  
314 (intron1), while other family members, such as *RFX5* and *RFX1*, did not display p53 binding  
315 (Figure 1C and Supplementary Figure 1A). To test whether RFX7 or its ubiquitously expressed  
316 siblings RFX5 and RFX1 (3) affect p53-dependent up-regulation of genes, we selected  
317 potential target genes out of the 1081 genes potentially up-regulated indirectly by p53 that  
318 were frequently identified to bind RFX5 (Figure 1A). We selected *PDCD4*, *PIK3IP1*, *MXD4*,  
319 and *PNRC1* that are frequently up-regulated by p53 and that were identified in all six RFX5  
320 ChIP-seq tracks (Figure 1A). Notably, *PDCD4*, *PIK3IP1*, *MXD4*, and *PNRC1* encode  
321 established tumor suppressors, which have not yet been established as p53-responsive genes  
322 (57–60). To this end, we employed the osteosarcoma cell line U2OS, which possesses intact  
323 p53 and is frequently used to study p53 and its signaling pathway (20). To specifically activate  
324 p53, we pharmacologically inhibited MDM2, the central gatekeeper of p53 activity, using the  
325 small molecule Nutlin-3a (61). RT-qPCR data confirmed that *PDCD4*, *PIK3IP1*, *MXD4*, and  
326 *PNRC1* are up-regulated in response to Nutlin-3a treatment. Importantly, the Nutlin-3a-induced  
327 up-regulation of *PDCD4*, *PIK3IP1*, *MXD4*, and *PNRC1* was attenuated upon knockdown of  
328 p53 and RFX7 (Figure 1D). In contrast to RFX7, depletion of RFX1 and RFX5 did not affect  
329 the p53-dependent induction of *PDCD4*, *PIK3IP1*, *MXD4*, and *PNRC1*. Thus, despite its  
330 similarity to RFX5, RFX7 plays a clearly distinct and strikingly consequential role in regulating

331 those genes. Significantly, p53-dependent up-regulation of *CDKN1A* was not affected by RFX7  
332 depletion, providing further evidence that RFX7 functions downstream of p53. Intriguingly,  
333 *RFX5* also appeared to be up-regulated by this novel p53-RFX7 signaling axis (Figure 1D).  
334 Western blot analyses indicated a p53-dependent induction of RFX7 protein levels upon Nutlin-  
335 3a treatment. In particular, a lower migrating form of RFX7 was induced in response to p53  
336 activation (Figure 1E). Moreover, protein levels of *PDCD4* and *PIK3IP1* followed the p53-  
337 RFX7-dependent up-regulation of their mRNAs (Figure 1E). Further, ChIP-qPCR data  
338 revealed that RFX7 occupies the promoter regions of *PDCD4*, *PIK3IP1*, *MXD4*, and *PNRC1*.  
339 Upon Nutlin-3a treatment, RFX7 occupancy increased, while p53 did not occupy these regions  
340 (Figure 1F). These results establish that p53 can activate RFX7 to employ the RFX7 GRN  
341 revealing a novel p53-RFX7 signaling axis.

342 To test whether the p53-dependent function of RFX7 is cell type-specific or represents a  
343 more ubiquitous mechanism, we employed the colorectal cancer cell line HCT116 and the  
344 hTERT-immortalized non-cancerous retina pigmented epithelium cell line RPE-1, both of which  
345 possess wild-type p53. ChIP-qPCR analysis confirmed that p53 binds to two sites in RFX7  
346 intron1 in U2OS, HCT116, and RPE-1 cells (Figure 2A). Similar to our results from U2OS cells  
347 (Figure 1D and E), *PDCD4*, *PIK3IP1*, *MXD4*, and *PNRC1* were induced upon Nutlin-3a  
348 treatment in HCT116 and RPE-1 cells in a p53 and RFX7-dependent manner, while *CDKN1A*  
349 was not affected by RFX7 depletion (Figure 2B). Protein levels of *PDCD4* and *PIK3IP1* largely  
350 followed the p53-RFX7-dependent regulation of their mRNAs (Figure 2C). Given the diversity  
351 of the investigated cell lines, our data suggest that the novel p53-RFX7 signaling axis  
352 influences numerous cell types. Together, our findings establish RFX7 as a novel direct p53  
353 target that extends p53-dependent gene activation to potent tumor suppressor genes in  
354 numerous cell types.

355

### 356 **The RFX7 DNA binding landscape enriches proximal promoter regions**

357 The identification of p53 as an upstream regulator of RFX7 enabled us to induce RFX7  
358 levels and activity pharmacologically. Although RFX7 emerged as a potent suppressor of

359 lymphoid cancers and putative cancer driver in Burkitt lymphoma (4, 5, 9, 62), the mechanisms  
360 underlying its tumor suppressor function remain elusive. Given that RFX7 is a transcription  
361 factor, it seems natural that its tumor suppressor function is mediated through its target genes.  
362 To identify RFX7 target genes genome-wide, we performed ChIP-seq in Nutlin-3a and DMSO  
363 control-treated U2OS, HCT116, and RPE-1 cells (Figure 3A, Supplementary Table 1).  
364 Substantially more RFX7 binding sites were identified in Nutlin-3a compared to DMSO control-  
365 treated cells (Supplementary Table 1), underlining the importance of inducing RFX7 levels and  
366 activity to identify RFX7-dependent genome regulation. We focused further investigations on  
367 sites occupied by RFX7 across all three cell types upon Nutlin-3a treatment (Figure 3A). RFX7  
368 binding sites are phylogenetically conserved (Figure 3B) and predominantly located near  
369 transcriptional start sites (TSSs) (Figure 3C). *De novo* search for motifs underlying RFX7  
370 binding sites revealed an X-box that is commonly recognized by the RFX family (1) and a  
371 CCAAT-box known to recruit NF-Y (63) (Figure 3D). Corroborating the ChIP-qPCR results  
372 (Figure 1F), Nutlin-3a treatment led to increased RFX7 DNA occupancy genome-wide (Figure  
373 3E). For example, the p53-RFX7-regulated genes *PNRC1* and *MXD4* (Figure 1D and E)  
374 display RFX7 binding near their TSSs, which increased upon Nutlin-3a treatment (Figure 3F).  
375 Enrichment analysis identified RFX5 and its co-factor CIITA, FOS, NF-Y, CREB1, EP300, and  
376 STAT3, among others, to share a significant number of binding sites with RFX7 (Figure 3G),  
377 which indicates that RFX5 and RFX7 bind to similar sites and that RFX7, similar to RFX5 (64),  
378 may cooperate with the CCAAT-box binding NF-Y. Given that RFX5 but not RFX1 was  
379 identified to share binding sites with RFX7 (Figure 3G), we compared the RFX7 X-box motif  
380 (Figure 3D) with known X-box motifs of the RFX family to identify potential differences. RFX7  
381 shares the X-box motif with other RFX family members, but it shows a clear distinction. While  
382 RFX1-3 bind to a palindromic X-box comprising two half-sites (1), RFX7 – similar to RFX5 –  
383 binds to an X-box with only one half-site (Figure 3H). Although the RFX family shares a  
384 conserved DBD, there are differences in their motif recognition, which offers an explanation for  
385 sites that are exclusively bound by RFX7 and RFX5. However, comparing the binding site  
386 repertoire of RFX5 and RFX7 revealed a substantial difference as RFX7 occupies only a small

387 subset of RFX5 binding sites (Figure 3I). Together, these findings show that RFX7 differs  
388 markedly from all other members of the RFX transcription factor family, including its  
389 phylogenetically closest sibling RFX5.

390

### 391 **RFX7 functions as a *trans*-activator to alter the transcriptome**

392 To complement the RFX7 DNA binding landscape, we identified the RFX7-regulated  
393 transcriptome through RNA-seq analyses of U2OS, HCT116, and RPE-1 cells treated with  
394 Nutlin-3a or DMSO control. RNA-seq data confirmed significant Nutlin-3a-induced up-  
395 regulation of *RFX5* and *RFX7*, while *RFX1* is not induced (Figure 4A). Depletion of RFX7  
396 caused up and down-regulation of several hundred genes (Figure 4B, Supplementary Table  
397 2). While RFX7-dependent regulation was observed to be cell line-specific at large, we  
398 identified multiple genes affected by RFX7 depletion across cell lines. Genes down-regulated  
399 upon RFX7 knockdown enriched for RFX5 binding and NF-Y motifs. In contrast, up-regulated  
400 genes enriched for AP-1 (JUN/FOS) binding and motifs (Figure 4C). The fact that RFX7  
401 occupies similar sites as RFX5 and NF-Y (Figure 3G) already indicates that RFX7 may  
402 predominantly *trans*-activate its target genes. Indeed, integration of ChIP-seq and  
403 transcriptome data corroborates RFX7's *trans*-activator function (Supplementary Figure 1B).  
404 In turn, the set of genes directly activated by RFX7 might indirectly convey repressive effects  
405 on the highly cell-type specific AP-1 signaling.

406

### 407 **The RFX7 target gene network comprises multiple tumor suppressors and responds to** 408 **stress**

409 We integrated the RFX7 DNA binding landscape and the RFX7-regulated transcriptome  
410 to infer potential direct RFX7 target genes genome-wide. We identified 51, 87, and 73 potential  
411 direct RFX7 targets in U2OS, HCT116, and RPE-1 cells, respectively, and these direct RFX7  
412 targets include *PDCD4*, *PIK3IP1*, *MXD4*, and *PNRC1* (Figure 4D). Most strikingly, target genes  
413 up-regulated through the p53-RFX7 axis comprise additional tumor suppressor genes, such  
414 as *ABAT* (65), *CCNG2* (66), *IP6K2* (67), *OTUD5* (68), *REV3L* (69), *RPS6KA5* (also known as

415 *MSK1* (70), *TOB1* (71), *TSC22D1* (72), and *TSPYL2* (73). Most direct RFX7 targets were up-  
416 regulated in response to Nutlin-3a treatment in siControl-transfected cells, and the up-  
417 regulation was impaired or abrogated when RFX7 was depleted (Figure 4D). Notably, 15, 19,  
418 and 16 (20-30%) of direct RFX7 target genes identified in U2OS, HCT116, and RPE-1 cell,  
419 respectively, displayed conserved Rfx7-dependent expression in mouse spleen or bone  
420 marrow (Supplementary Table 3) (17). Direct RFX7 target genes down-regulated upon Nutlin-  
421 3a treatment comprise cell cycle genes, including *DOLPP1*, *XRCC1*, *CDK4*, *CKAP2*,  
422 *FAM111A*, and *CKS2*, that become down-regulated through the *trans*-repressor complex  
423 DREAM (20). These Nutlin-3a-repressed genes display a more marked decrease in mRNA  
424 levels when RFX7 is missing, suggesting that RFX7 partially counteracts and limits their p53-  
425 dependent down-regulation. Given that RPE-1 is no established cell line model in p53  
426 research, we provide data showing that depletion of p53 in RPE-1 abrogated the Nutlin-3a-  
427 induced regulation of all those genes (Figure 4D). Direct RFX7 target genes identified in at  
428 least two of the three cell lines comprise a set of 57 genes (Table 1). In addition to regulating  
429 multiple tumor suppressors directly, our data reveal a large p53-dependent subnetwork co-  
430 directed by RFX7 (Supplementary Figure 2, Supplementary Table 2), further highlighting the  
431 impact of the novel p53-RFX7 signaling axis.

432 Integration of our meta-analysis data (20) showed that most direct RFX7 targets become  
433 up-regulated by p53 in various cell types and in response to multiple stimuli (Figure 5A).  
434 Consequently, we tested whether RFX7 affected their regulation in response to cellular stress.  
435 To this end, we employed Doxorubicin and Actinomycin D, which are well-established to induce  
436 the p53 program (20). Doxorubicin is a topoisomerase II inhibitor that causes DNA double-  
437 strand breaks while Actinomycin D inhibits rRNA transcription inducing ribosomal stress.  
438 *PDCD4*, *PIK3IP1*, *MXD4*, and *PNRC1* were up-regulated in response to Nutlin-3a, Actinomycin  
439 D, and Doxorubicin treatment. The up-regulation was attenuated when p53 or RFX7 were  
440 depleted. The direct p53 target *CDKN1A* was up-regulated p53-dependent and RFX7-  
441 independent (Figure 5B). These results identify RFX7 as a missing link to up-regulate  
442 numerous tumor suppressor genes in response to stress.



443

444 **High RFX7 target gene expression is associated with better prognosis in cancer patients**  
445 **and cell differentiation**

446 We and others identified RFX7 as a putative cancer driver in Burkitt Lymphoma (4, 5),  
447 and mouse data confirmed its tumor suppressor function in lymphoma development (9). Here,  
448 we identified RFX7 to induce well-established tumor suppressor genes in numerous cell types  
449 (Figure 4D). To assess whether RFX7 may affect cell growth and tumor development also in  
450 cell types outside the lymphoid lineage, we resorted to publicly available cell viability data from  
451 the DepMap project (51). Intriguingly, *RFX7* knockdown increased the viability of the majority  
452 of 343 cell lines tested, while the viability of lymphoma cell lines increased the most (Figure  
453 6A). Given that RFX7 appears to restrict cell growth across a wide range of cell types, we  
454 sought to assess the potential role of RFX7 signaling in numerous cancer types. Therefore,  
455 we resorted to the cancer genome atlas (TCGA) that comprises patient data from 33 cancer  
456 types (74), and we tested whether RFX7 target gene expression is associated with patient  
457 survival. To avoid confounding effects from cell cycle genes, which are well-established to be  
458 associated with worse prognosis across cancer types (75), we used a subset of 19 direct RFX7  
459 target genes that are frequently up-regulated by p53. Strikingly, higher expression of these  
460 direct RFX7 targets correlates significantly with better prognosis across the whole TCGA pan-  
461 cancer cohort (Figure 6B and Supplementary Figure 3). Survival analyses using data from the  
462 33 individual cancer types revealed that in 11 out of the 33 individual cancer types higher  
463 expression of the RFX7 targets correlates significantly with better prognosis (Figure 7). These  
464 findings indicate that RFX7 signaling is frequently de-regulated in cancer. Together, these data  
465 indicate a ubiquitous role of RFX7 in restricting cell growth and potential clinical implications  
466 of this new signaling axis in numerous cancer types.

467 Cell differentiation represents an anti-proliferative mechanism that is typically  
468 circumvented by cancer (76). More differentiated cancer cells are characterized as low grade  
469 and are often associated with a favorable prognosis. Notably, RFX7 orthologs have been  
470 shown to play a role in the development of murine natural killer cells (17) and in the neural

471 development of frogs (16). Given that several direct RFX7 targets have been associated with  
472 cell differentiation, such as the MYC antagonist MXD4 (also known as MAD4) (77), we tested  
473 whether RFX7 could play a more general role during differentiation. Therefore, we assessed  
474 the expression of RFX7 target genes when human p53-negative HL-60 promyelocytes  
475 differentiated into macrophages or neutrophils. Interestingly, RFX7 target gene expression  
476 correlated significantly positively with macrophage and neutrophil differentiation (Figure 6C),  
477 indicating a potential role for RFX7 in hematopoietic differentiation that is independent of p53.  
478 Further, RFX7 target gene expression correlated positively with the differentiation of human  
479 umbilical cord blood-derived unrestricted somatic stem cells into neuronal-like cells (Figure  
480 6C), which is in agreement with the reported role of RFX7 in the neural development of frogs  
481 (16) and its association with neurological diseases (14, 15). Intriguingly, the expression of  
482 RFX7 target genes correlates significantly positively also with the differentiation of human  
483 pluripotent stem cells into lung alveolar cells (Figure 6C). Together, these results indicate a  
484 potentially widespread role of RFX7 in promoting cell differentiation.

485

#### 486 **RFX7 sensitizes cells to Doxorubicin and promotes apoptosis**

487 The potentially widespread role of RFX7 in cancer (Figure 6B and 7) and its activation in  
488 response to cellular stress (Figure 5) prompted us to investigate the role of RFX7 in the stress  
489 response. To this end, we challenged U2OS osteosarcoma and HCT116 colorectal cancer  
490 cells with different concentrations of Doxorubicin. Intriguingly, WST-1 assays showed that  
491 RFX7 depletion significantly increased the viability of U2OS and HCT116 cells challenged with  
492 low concentrations of Doxorubicin, with HCT116 showing the highest benefit (Figure 8A).  
493 Confirming previous results (78), depletion of p53 did not increase the viability. We further  
494 assessed the response in HCT116 cells, and validated increased viability in response to  
495 Doxorubicin through clonogenic and Annexin V assays (Figure 8B and C). Importantly,  
496 Annexin V assays revealed that the increased cell viability upon RFX7 depletion was  
497 associated with significantly reduced apoptosis (Figure 8C). Thus, RFX7 appears to sensitize

498 cells to Doxorubicin through promoting apoptosis, indicating a role of RFX7 in cell fate  
499 determination in response to stress.

500

## 501 **Discussion**

502 p53 is the best-known tumor suppressor, but it remains unclear how it regulates large  
503 parts of its GRN. Our findings place the understudied transcription factor RFX7 immediately  
504 downstream of p53 in regulating multiple genes. RFX7 emerged recently as an essential  
505 regulator of lymphoid cell maturation (17) and a putative cancer driver mutated in  
506 hematopoietic neoplasms (62). While these observations are in agreement with the maximal  
507 expression of *RFX7* in lymphoid tissue (3, 17), our results using human osteosarcoma,  
508 colorectal cancer, and non-cancerous retinal pigment epithelial cells establish a ubiquitous role  
509 of RFX7 in regulating known tumor suppressors and in serving as a crucial regulatory arm of  
510 the p53 tumor suppressor. We establish p53 as the first regulator of the novel tumor suppressor  
511 RFX7 and exploit this regulatory connection to chart RFX7's target gene network in three  
512 distinct cell systems. Most importantly, the RFX7 network comprises multiple established  
513 tumor suppressor offering an explanation for RFX7's tumor suppressor role. For example,  
514 similar to the lymphoma-promoting loss of *Rfx7* in a mouse model (9), mice carrying a knockout  
515 of the RFX7 targets *PDCD4* and *REV3L* displayed spontaneous lymphomagenesis (57, 69).  
516 Similar to the transcription factor p53, RFX7 appears to orchestrate its tumor suppressive  
517 function through multiple target genes.

518 The general importance of RFX7 signaling in cancer biology is exemplified by the better  
519 prognosis of patients with medium to high expression of RFX7 targets across the pan-cancer  
520 cohort (Figure 6B). While frequent mutations in *RFX7* so far have been identified only in Burkitt  
521 lymphoma (4, 5, 62), the altered expression of direct RFX7 target genes across numerous  
522 cancer types (Figure 6B and 7) indicates that RFX7 signaling is recurrently de-regulated in  
523 cancer. High expression of RFX7 target genes during differentiation (Figure 6C) and RFX7's  
524 apoptosis-promoting function in response to stress (Figure 8) indicate a widespread role of  
525 RFX7 in cell fate determination and may at least in part account for the better prognosis

526 observed in cancer patients with higher RFX7 target gene expression. RFX7 promoting  
527 apoptosis in response to Doxorubicin treatment may be attributed to its target IP6K2, an  
528 established inducer of apoptosis (67).

529         The direct RFX7 target genes *RPS6KA5* (*MSK1*) and *ARL15* (Figure 4D) may explain  
530 the link between *RFX7* alteration and increased waist-hip-ratio (13), as both genes have been  
531 associated with obesity and high waist-hip-ratio (79). Furthermore, RFX7 directly regulates  
532 multiple transcription factors, including JUNB, KLF9, MAF, MXD4, RFX5, SOX4, SOX12, and  
533 TSC22D1, as well as chromatin modifiers, which may affect many RFX7-regulated genes that  
534 are not bound by RFX7 itself (Figure 4D, Supplementary Figure 2).

535         In summary, our findings suggest that the RFX7 signaling pathway represents a novel  
536 growth regulatory mechanism that is activated in response to stress and p53. Given the  
537 importance of the discovered regulatory connection, we expect our data to be essential in  
538 triggering further research into RFX7's regulatory network, potentially leading to new  
539 diagnostic and therapeutic approaches.

540 **Acknowledgements**

541 This work was supported by the German Research Foundation (DFG) [research grant FI  
542 1993/2-1 to M.F.] and the German Federal Ministry for Education and Research (BMBF)  
543 [031L016D to S.H.; ICGC MMML-Seq 01KU1002A-J and ICGC-Data Mining 01KU1505-C and  
544 G to R.S. and S.H.]. The FLI is a member of the Leibniz Association and is financially supported  
545 by the Federal Government of Germany and the State of Thuringia.

546 We gratefully acknowledge the FLI Core Facilities DNA-sequencing (Ivonne Görlich and  
547 Cornelia Luge) and Flow Cytometry (Michelle Burkhardt) for their technical support. We thank  
548 Bernhard Schlott for the kind gift of p53 antibody.

549

550 **Author Contributions**

551 M.F. conceived the study. M.F. and S.H. supervised the work. M.F., L.C., and S.H.  
552 designed the experiments. L.C., K.S., M.F., S.F., D.H., and L.S. performed the experiments.  
553 K.R., M.F., S.H.B., and S.H. performed the computational analyses. M.F., S.H., R.S., and L.C.  
554 interpreted the data. M.F. wrote the manuscript with the help of S.H. All authors read and  
555 approved the manuscript.

556

557 **Declaration of interests**

558 R.S. received speaker's honorary from AstraZeneca and Roche. All other authors  
559 declare no competing interests.

560

561 **Supplemental Information** is available for this paper.

562

563 **Reference List**

- 564 1. Gajiwala,K.S., Chen,H., Cornille,F., Roques,B.P., Reith,W., Mach,B. and Burley,S.K.  
565 (2000) Structure of the winged-helix protein hRFX1 reveals a new mode of DNA  
566 binding. *Nature*, **403**, 916–921.
- 567 2. Sugiaman-Trapman,D., Vitezic,M., Jouhilahti,E.-M., Mathelier,A., Lauter,G., Misra,S.,  
568 Daub,C.O., Kere,J. and Swoboda,P. (2018) Characterization of the human RFX  
569 transcription factor family by regulatory and target gene analysis. *BMC Genomics*, **19**,  
570 181.
- 571 3. Aftab,S., Semenc,L., Chu,J.S.-C. and Chen,N. (2008) Identification and characterization  
572 of novel human tissue-specific RFX transcription factors. *BMC Evol. Biol.*, **8**, 226.
- 573 4. López,C., Kleinheinz,K., Aukema,S.M., Rohde,M., Bernhart,S.H., Hübschmann,D.,  
574 Wagener,R., Toprak,U.H., Raimondi,F., Kreuz,M., *et al.* (2019) Genomic and  
575 transcriptomic changes complement each other in the pathogenesis of sporadic Burkitt  
576 lymphoma. *Nat. Commun.*, **10**, 1459.
- 577 5. Grande,B.M., Gerhard,D.S., Jiang,A., Griner,N.B., Abramson,J.S., Alexander,T.B.,  
578 Allen,H., Ayers,L.W., Bethony,J.M., Bhatia,K., *et al.* (2019) Genome-wide discovery of  
579 somatic coding and noncoding mutations in pediatric endemic and sporadic Burkitt  
580 lymphoma. *Blood*, **133**, 1313.
- 581 6. Berndt,S.I., Skibola,C.F., Joseph,V., Camp,N.J., Nieters,A., Wang,Z., Cozen,W.,  
582 Monnereau,A., Wang,S.S., Kelly,R.S., *et al.* (2013) Genome-wide association study  
583 identifies multiple risk loci for chronic lymphocytic leukemia. *Nat. Genet.*, **45**, 868–876.
- 584 7. Speedy,H.E., Di Bernardo,M.C., Sava,G.P., Dyer,M.J.S., Holroyd,A., Wang,Y.,  
585 Sunter,N.J., Mansouri,L., Juliusson,G., Smedby,K.E., *et al.* (2014) A genome-wide  
586 association study identifies multiple susceptibility loci for chronic lymphocytic leukemia.  
587 *Nat. Genet.*, **46**, 56–60.
- 588 8. Crowther-Swanepoel,D., Broderick,P., Di Bernardo,M.C., Dobbins,S.E., Torres,M.,  
589 Mansouri,M., Ruiz-Ponte,C., Enjuanes,A., Rosenquist,R., Carracedo,A., *et al.* (2010)  
590 Common variants at 2q37.3, 8q24.21, 15q21.3 and 16q24.1 influence chronic  
591 lymphocytic leukemia risk. *Nat. Genet.*, **42**, 132–136.
- 592 9. Weber,J., de la Rosa,J., Grove,C.S., Schick,M., Rad,L., Baranov,O., Strong,A., Pfaus,A.,  
593 Friedrich,M.J., Engleitner,T., *et al.* (2019) PiggyBac transposon tools for recessive  
594 screening identify B-cell lymphoma drivers in mice. *Nat. Commun.*, **10**, 1415.
- 595 10. Bullinger,L., Krönke,J., Schön,C., Radtke,I., Urbauer,K., Botzenhardt,U., Gaidzik,V.,  
596 Carió,A., Senger,C., Schlenk,R.F., *et al.* (2010) Identification of acquired copy number  
597 alterations and uniparental disomies in cytogenetically normal acute myeloid leukemia  
598 using high-resolution single-nucleotide polymorphism analysis. *Leukemia*, **24**, 438–449.
- 599 11. Rusiniak,M.E., Kunnev,D., Freeland,A., Cady,G.K. and Pruitt,S.C. (2012) Mcm2



- 600 deficiency results in short deletions allowing high resolution identification of genes  
601 contributing to lymphoblastic lymphoma. *Oncogene*, **31**, 4034–4044.
- 602 12. Rogers,L.M., Olivier,A.K., Meyerholz,D.K. and Dupuy,A.J. (2013) Adaptive Immunity  
603 Does Not Strongly Suppress Spontaneous Tumors in a Sleeping Beauty Model of  
604 Cancer. *J. Immunol.*, **190**, 4393–4399.
- 605 13. Shungin,D., Winkler,T.W., Croteau-Chonka,D.C., Ferreira,T., Locke,A.E., Mägi,R.,  
606 Strawbridge,R.J., Pers,T.H., Fischer,K., Justice,A.E., *et al.* (2015) New genetic loci link  
607 adipose and insulin biology to body fat distribution. *Nature*, **518**, 187–196.
- 608 14. Kim,D., Basile,A.O., Bang,L., Horgusluoglu,E., Lee,S., Ritchie,M.D., Saykin,A.J. and  
609 Nho,K. (2017) Knowledge-driven binning approach for rare variant association analysis:  
610 application to neuroimaging biomarkers in Alzheimer’s disease. *BMC Med. Inform.*  
611 *Decis. Mak.*, **17**, 61.
- 612 15. Harris,H.K., Nakayama,T., Lai,J., Zhao,B., Argyrou,N., Gubbels,C.S., Soucy,A.,  
613 Genetti,C.A., Suslovitch,V., Rodan,L.H., *et al.* (2021) Disruption of RFX family  
614 transcription factors causes autism, attention-deficit/hyperactivity disorder, intellectual  
615 disability, and dysregulated behavior. *Genet. Med.*, 10.1038/s41436-021-01114-z.
- 616 16. Manojlovic,Z., Earwood,R., Kato,A., Stefanovic,B. and Kato,Y. (2014) RFX7 is required  
617 for the formation of cilia in the neural tube. *Mech. Dev.*, **132**, 28–37.
- 618 17. Castro,W., Chelbi,S.T., Niogret,C., Ramon-Barros,C., Welten,S.P.M., Osterheld,K.,  
619 Wang,H., Rota,G., Morgado,L., Vivier,E., *et al.* (2018) The transcription factor Rfx7  
620 limits metabolism of NK cells and promotes their maintenance and immunity. *Nat.*  
621 *Immunol.*, **19**, 809–820.
- 622 18. Fischer,M. (2017) Census and evaluation of p53 target genes. *Oncogene*, **36**, 3943–  
623 3956.
- 624 19. Sammons,M.A., Nguyen,T.-A.T., McDade,S.S. and Fischer,M. (2020) Tumor suppressor  
625 p53: from engaging DNA to target gene regulation. *Nucleic Acids Res.*, **48**, 8848–8869.
- 626 20. Fischer,M., Grossmann,P., Padi,M. and DeCaprio,J.A. (2016) Integration of TP53,  
627 DREAM, MMB-FOXO1 and RB-E2F target gene analyses identifies cell cycle gene  
628 regulatory networks. *Nucleic Acids Res.*, **44**, 6070–6086.
- 629 21. Fischer,M., Quaas,M., Steiner,L. and Engeland,K. (2016) The p53-p21-DREAM-  
630 CDE/CHR pathway regulates G2/M cell cycle genes. *Nucleic Acids Res.*, **44**, 164–174.
- 631 22. Uxa,S., Bernhart,S.H., Mages,C.F.S., Fischer,M., Kohler,R., Hoffmann,S., Stadler,P.F.,  
632 Engeland,K. and Müller,G.A. (2019) DREAM and RB cooperate to induce gene  
633 repression and cell-cycle arrest in response to p53 activation. *Nucleic Acids Res.*, **47**,  
634 9087–9103.
- 635 23. Schade,A.E., Fischer,M. and DeCaprio,J.A. (2019) RB, p130 and p107 differentially  
636 repress G1/S and G2/M genes after p53 activation. *Nucleic Acids Res.*, **47**, 11197–

- 637 11208.
- 638 24. Baum,N., Schiene-Fischer,C., Frost,M., Schumann,M., Sabapathy,K., Ohlenschläger,O.,  
639 Grosse,F. and Schlott,B. (2009) The prolyl cis/trans isomerase cyclophilin 18 interacts  
640 with the tumor suppressor p53 and modifies its functions in cell cycle regulation and  
641 apoptosis. *Oncogene*, **28**, 3915–3925.
- 642 25. Bolger,A.M., Lohse,M. and Usadel,B. (2014) Trimmomatic: a flexible trimmer for Illumina  
643 sequence data. *Bioinformatics*, **30**, 2114–2120.
- 644 26. Martin,M. (2011) Cutadapt removes adapter sequences from high-throughput sequencing  
645 reads. *EMBnet.journal*, **17**, 10.
- 646 27. Song,L. and Florea,L. (2015) Rcorrector: efficient and accurate error correction for  
647 Illumina RNA-seq reads. *Gigascience*, **4**, 48.
- 648 28. Kopylova,E., Noé,L. and Touzet,H. (2012) SortMeRNA: Fast and accurate filtering of  
649 ribosomal RNAs in metatranscriptomic data. *Bioinformatics*, **28**, 3211–3217.
- 650 29. Cunningham,F., Achuthan,P., Akanni,W., Allen,J., Amode,M.R., Armean,I.M., Bennett,R.,  
651 Bhai,J., Billis,K., Boddus,S., *et al.* (2019) Ensembl 2019. *Nucleic Acids Res.*, **47**, D745–  
652 D751.
- 653 30. Hoffmann,S., Otto,C., Kurtz,S., Sharma,C.M., Khaitovich,P., Vogel,J., Stadler,P.F. and  
654 Hackermüller,J. (2009) Fast Mapping of Short Sequences with Mismatches, Insertions  
655 and Deletions Using Index Structures. *PLoS Comput. Biol.*, **5**, e1000502.
- 656 31. Hoffmann,S., Otto,C., Doose,G., Tanzer,A., Langenberger,D., Christ,S., Kunz,M.,  
657 Holdt,L.M., Teupser,D., Hackermüller,J., *et al.* (2014) A multi-split mapping algorithm for  
658 circular RNA, splicing, trans-splicing and fusion detection. *Genome Biol.*, **15**, R34.
- 659 32. Li,H., Handsaker,B., Wysoker,A., Fennell,T., Ruan,J., Homer,N., Marth,G., Abecasis,G.  
660 and Durbin,R. (2009) The Sequence Alignment/Map format and SAMtools.  
661 *Bioinformatics*, **25**, 2078–2079.
- 662 33. Feng,J., Liu,T., Qin,B., Zhang,Y. and Liu,X.S. (2012) Identifying ChIP-seq enrichment  
663 using MACS. *Nat. Protoc.*, **7**, 1728–40.
- 664 34. Quinlan,A.R. and Hall,I.M. (2010) BEDTools: A flexible suite of utilities for comparing  
665 genomic features. *Bioinformatics*, **26**, 841–842.
- 666 35. Amemiya,H.M., Kundaje,A. and Boyle,A.P. (2019) The ENCODE Blacklist: Identification  
667 of Problematic Regions of the Genome. *Sci. Rep.*, **9**, 1–5.
- 668 36. Heinz,S., Benner,C., Spann,N., Bertolino,E., Lin,Y.C., Laslo,P., Cheng,J.X., Murre,C.,  
669 Singh,H. and Glass,C.K. (2010) Simple combinations of lineage-determining  
670 transcription factors prime cis-regulatory elements required for macrophage and B cell  
671 identities. *Mol. Cell*, **38**, 576–89.
- 672 37. Siepel,A., Bejerano,G., Pedersen,J.S., Hinrichs,A.S., Hou,M., Rosenbloom,K.,  
673 Clawson,H., Spieth,J., Hillier,L.W., Richards,S., *et al.* (2005) Evolutionarily conserved

- 674 elements in vertebrate, insect, worm, and yeast genomes. *Genome Res.*, **15**, 1034–  
675 1050.
- 676 38. Liu, T., Ortiz, J.A., Taing, L., Meyer, C.A., Lee, B., Zhang, Y., Shin, H., Wong, S.S., Ma, J.,  
677 Lei, Y., *et al.* (2011) Cistrome: an integrative platform for transcriptional regulation  
678 studies. *Genome Biol.*, **12**, R83.
- 679 39. Wang, S., Sun, H., Ma, J., Zang, C., Wang, C., Wang, J., Tang, Q., Meyer, C.A., Zhang, Y. and  
680 Liu, X.S. (2013) Target analysis by integration of transcriptome and ChIP-seq data with  
681 BETA. *Nat. Protoc.*, **8**, 2502–2515.
- 682 40. Zheng, R., Wan, C., Mei, S., Qin, Q., Wu, Q., Sun, H., Chen, C.-H., Brown, M., Zhang, X.,  
683 Meyer, C.A., *et al.* (2019) Cistrome Data Browser: expanded datasets and new tools for  
684 gene regulatory analysis. *Nucleic Acids Res.*, **47**, D729–D735.
- 685 41. Ramírez, F., Ryan, D.P., Grüning, B., Bhardwaj, V., Kilpert, F., Richter, A.S., Heyne, S.,  
686 Dündar, F. and Manke, T. (2016) deepTools2: a next generation web server for deep-  
687 sequencing data analysis. *Nucleic Acids Res.*, **44**, W160–W165.
- 688 42. Menendez, D., Nguyen, T.A., Freudenberg, J.M., Mathew, V.J., Anderson, C.W., Jothi, R.  
689 and Resnick, M.A. (2013) Diverse stresses dramatically alter genome-wide p53 binding  
690 and transactivation landscape in human cancer cells. *Nucleic Acids Res.*, **41**, 7286–  
691 7301.
- 692 43. Andrysiak, Z., Galbraith, M.D., Guarnieri, A.L., Zaccara, S., Sullivan, K.D., Pandey, A.,  
693 MacBeth, M., Inga, A. and Espinosa, J.M. (2017) Identification of a core TP53  
694 transcriptional program with highly distributed tumor suppressive activity. *Genome Res.*,  
695 **27**, 1645–1657.
- 696 44. Liao, Y., Smyth, G.K. and Shi, W. (2014) FeatureCounts: An efficient general purpose  
697 program for assigning sequence reads to genomic features. *Bioinformatics*, **30**, 923–  
698 930.
- 699 45. Wang, L., Wang, S. and Li, W. (2012) RSeQC: quality control of RNA-seq experiments.  
700 *Bioinformatics*, **28**, 2184–2185.
- 701 46. Love, M.I., Huber, W. and Anders, S. (2014) Moderated estimation of fold change and  
702 dispersion for RNA-seq data with DESeq2. *Genome Biol.*, **15**, 550.
- 703 47. Ramirez, R.N., El-Ali, N.C., Mager, M.A., Wyman, D., Conesa, A. and Mortazavi, A. (2017)  
704 Dynamic Gene Regulatory Networks of Human Myeloid Differentiation. *Cell Syst.*, **4**,  
705 416-429.e3.
- 706 48. Schira-Heinen, J., Czapla, A., Hendricks, M., Kloetgen, A., Wruck, W., Adjaye, J., Kögler, G.,  
707 Werner Müller, H., Stühler, K. and Trompeter, H.-I. (2020) Functional omics analyses  
708 reveal only minor effects of microRNAs on human somatic stem cell differentiation. *Sci.*  
709 *Rep.*, **10**, 3284.
- 710 49. Jacob, A., Morley, M., Hawkins, F., McCauley, K.B., Jean, J.C., Heins, H., Na, C.-L.,

- 711 Weaver, T.E., Vedaie, M., Hurley, K., *et al.* (2017) Differentiation of Human Pluripotent  
712 Stem Cells into Functional Lung Alveolar Epithelial Cells. *Cell Stem Cell*, **21**, 472-  
713 488.e10.
- 714 50. Janky, R., Verfaillie, A., Imrichová, H., van de Sande, B., Standaert, L., Christiaens, V.,  
715 Hulselmans, G., Herten, K., Naval Sanchez, M., Potier, D., *et al.* (2014) iRegulon: From a  
716 Gene List to a Gene Regulatory Network Using Large Motif and Track Collections. *PLoS*  
717 *Comput. Biol.*, **10**, e1003731.
- 718 51. Tsherniak, A., Vazquez, F., Montgomery, P.G., Weir, B.A., Kryukov, G., Cowley, G.S., Gill, S.,  
719 Harrington, W.F., Pantel, S., Krill-Burger, J.M., *et al.* (2017) Defining a Cancer  
720 Dependency Map. *Cell*, **170**, 564-576.e16.
- 721 52. McFarland, J.M., Ho, Z. V., Kugener, G., Dempster, J.M., Montgomery, P.G., Bryan, J.G.,  
722 Krill-Burger, J.M., Green, T.M., Vazquez, F., Boehm, J.S., *et al.* (2018) Improved  
723 estimation of cancer dependencies from large-scale RNAi screens using model-based  
724 normalization and data integration. *Nat. Commun.*, **9**, 4610.
- 725 53. Colaprico, A., Silva, T.C., Olsen, C., Garofano, L., Cava, C., Garolini, D., Sabedot, T.S.,  
726 Malta, T.M., Pagnotta, S.M., Castiglioni, I., *et al.* (2016) TCGAbiolinks: An R/Bioconductor  
727 package for integrative analysis of TCGA data. *Nucleic Acids Res.*, **44**, e71.
- 728 54. Barbie, D.A., Tamayo, P., Boehm, J.S., Kim, S.Y., Moody, S.E., Dunn, I.F., Schinzel, A.C.,  
729 Sandy, P., Meylan, E., Scholl, C., *et al.* (2009) Systematic RNA interference reveals that  
730 oncogenic KRAS-driven cancers require TBK1. *Nature*, **462**, 108–112.
- 731 55. Barrett, T., Wilhite, S.E., Ledoux, P., Evangelista, C., Kim, I.F., Tomashevsky, M.,  
732 Marshall, K.A., Phillippy, K.H., Sherman, P.M., Holko, M., *et al.* (2013) NCBI GEO: Archive  
733 for functional genomics data sets - Update. *Nucleic Acids Res.*, **41**, D991-5.
- 734 56. ENCODE Project Consortium (2012) An integrated encyclopedia of DNA elements in the  
735 human genome. *Nature*, **489**, 57–74.
- 736 57. Hilliard, A., Hilliard, B., Zheng, S.-J., Sun, H., Miwa, T., Song, W., Göke, R. and Chen, Y.H.  
737 (2006) Translational Regulation of Autoimmune Inflammation and Lymphoma Genesis  
738 by Programmed Cell Death 4. *J. Immunol.*, **177**, 8095–8102.
- 739 58. He, X., Zhu, Z., Johnson, C., Stoops, J., Eaker, A.E., Bowen, W. and DeFrances, M.C. (2008)  
740 PIK3IP1, a negative regulator of PI3K, suppresses the development of hepatocellular  
741 carcinoma. *Cancer Res.*, **68**, 5591–8.
- 742 59. Gaviraghi, M., Vivori, C., Pareja Sanchez, Y., Invernizzi, F., Cattaneo, A., Santoliquido, B.M.,  
743 Frenquelli, M., Segalla, S., Bachi, A., Doglioni, C., *et al.* (2018) Tumor suppressor PNR1  
744 blocks rRNA maturation by recruiting the decapping complex to the nucleolus. *EMBO J.*,  
745 **37**, e99179.
- 746 60. Schaub, F.X., Dhankani, V., Berger, A.C., Trivedi, M., Richardson, A.B., Shaw, R., Zhao, W.,  
747 Zhang, X., Ventura, A., Liu, Y., *et al.* (2018) Pan-cancer Alterations of the MYC Oncogene

- 748 and Its Proximal Network across the Cancer Genome Atlas. *Cell Syst.*, **6**, 282-300.e2.
- 749 61. Vassilev,L.T., Vu,B.T., Graves,B., Carvajal,D., Podlaski,F., Filipovic,Z., Kong,N.,  
750 Kammlott,U., Lukacs,C., Klein,C., *et al.* (2004) In vivo activation of the p53 pathway by  
751 small-molecule antagonists of MDM2. *Science*, **303**, 844–8.
- 752 62. Fischer,B.A., Chelbi,S.T. and Guarda,G. (2020) Regulatory Factor X 7 and its Potential  
753 Link to Lymphoid Cancers. *Trends in Cancer*, **6**, 6–9.
- 754 63. Nardini,M., Gnesutta,N., Donati,G., Gatta,R., Forni,C., Fossati,A., Vonnrhein,C., Moras,D.,  
755 Romier,C., Bolognesi,M., *et al.* (2013) Sequence-specific transcription factor NF-Y  
756 displays histone-like DNA binding and H2B-like ubiquitination. *Cell*, **152**, 132–143.
- 757 64. Reith,W., LeibundGut-Landmann,S. and Waldburger,J.-M. (2005) Regulation of MHC  
758 class II gene expression by the class II transactivator. *Nat. Rev. Immunol.*, **5**, 793–806.
- 759 65. Chen,X., Cao,Q., Liao,R., Wu,X., Xun,S., Huang,J. and Dong,C. (2019) Loss of ABAT-  
760 Mediated GABAergic System Promotes Basal-Like Breast Cancer Progression by  
761 Activating Ca<sup>2+</sup>-NFAT1 Axis. *Theranostics*, **9**, 34–47.
- 762 66. Bernaudo,S., Salem,M., Qi,X., Zhou,W., Zhang,C., Yang,W., Rosman,D., Deng,Z.,  
763 Ye,G., Yang,B.B., *et al.* (2016) Cyclin G2 inhibits epithelial-to-mesenchymal transition  
764 by disrupting Wnt/ $\beta$ -catenin signaling. *Oncogene*, **35**, 4816–27.
- 765 67. Nagata,E., Luo,H.R., Saiardi,A., Bae,B. II, Suzuki,N. and Snyder,S.H. (2005) Inositol  
766 hexakisphosphate kinase-2, a physiologic mediator of cell death. *J. Biol. Chem.*, **280**,  
767 1634–1640.
- 768 68. Li,F., Sun,Q., Liu,K., Zhang,L., Lin,N., You,K., Liu,M., Kon,N., Tian,F., Mao,Z., *et al.*  
769 (2020) OTUD5 cooperates with TRIM25 in transcriptional regulation and tumor  
770 progression via deubiquitination activity. *Nat. Commun.*, **11**, 4184.
- 771 69. Wittschieben,J.P., Patil,V., Glushets,V., Robinson,L.J., Kusewitt,D.F. and Wood,R.D.  
772 (2010) Loss of DNA polymerase zeta enhances spontaneous tumorigenesis. *Cancer*  
773 *Res.*, **70**, 2770–8.
- 774 70. Gawrzak,S., Rinaldi,L., Gregorio,S., Arenas,E.J., Salvador,F., Urosevic,J., Figueras-  
775 Puig,C., Rojo,F., del Barco Barrantes,I., Cejalvo,J.M., *et al.* (2018) MSK1 regulates  
776 luminal cell differentiation and metastatic dormancy in ER+ breast cancer. *Nat. Cell*  
777 *Biol.*, **20**, 211–221.
- 778 71. Yoshida,Y., Nakamura,T., Komoda,M., Satoh,H., Suzuki,T., Tsuzuku,J.K., Miyasaka,T.,  
779 Yoshida,E.H., Umemori,H., Kunisaki,R.K., *et al.* (2003) Mice lacking a transcriptional  
780 corepressor Tob are predisposed to cancer. *Genes Dev.*, **17**, 1201–1206.
- 781 72. Yu,J., Ershler,M., Yu,L., Wei,M., Hackanson,B., Yokohama,A., Mitsui,T., Liu,C.C.G.,  
782 Mao,H., Liu,S., *et al.* (2009) TSC-22 contributes to hematopoietic precursor cell  
783 proliferation and repopulation and is epigenetically silenced in large granular lymphocyte  
784 leukemia. *Blood*, **113**, 5558–5567.



- 785 73. Epping,M.T., Lunardi,A., Nachmani,D., Castillo-Martin,M., Thin,T.H., Cordon-Cardo,C.  
786 and Pandolfi,P.P. (2015) TSPYL2 is an essential component of the REST/NRSF  
787 transcriptional complex for TGF $\beta$  signaling activation. *Cell Death Differ.*, **22**, 1353–1362.
- 788 74. Hoadley,K.A., Yau,C., Hinoue,T., Wolf,D.M., Lazar,A.J., Drill,E., Shen,R., Taylor,A.M.,  
789 Cherniack,A.D., Thorsson,V., *et al.* (2018) Cell-of-Origin Patterns Dominate the  
790 Molecular Classification of 10,000 Tumors from 33 Types of Cancer. *Cell*, **173**, 291-  
791 304.e6.
- 792 75. Whitfield,M.L., George,L.K., Grant,G.D. and Perou,C.M. (2006) Common markers of  
793 proliferation. *Nat. Rev. Cancer*, **6**, 99–106.
- 794 76. Hanahan,D. and Weinberg,R.A. (2000) The Hallmarks of Cancer. *Cell*, **100**, 57–70.
- 795 77. Hurlin,P.J., Quéva,C., Koskinen,P.J., Steingrímsson,E., Ayer,D.E., Copeland,N.G.,  
796 Jenkins,N.A. and Eisenman,R.N. (1995) Mad3 and Mad4: novel Max-interacting  
797 transcriptional repressors that suppress c-myc dependent transformation and are  
798 expressed during neural and epidermal differentiation. *EMBO J.*, **14**, 5646–59.
- 799 78. Yeo,C.Q.X., Alexander,I., Lin,Z., Lim,S., Aning,O.A., Kumar,R., Sangthongpitag,K.,  
800 Pendharkar,V., Ho,V.H.B. and Cheok,C.F. (2016) P53 Maintains Genomic Stability by  
801 Preventing Interference between Transcription and Replication. *Cell Rep.*, **15**, 132–146.
- 802 79. Ried,J.S., Jeff M.,J., Chu,A.Y., Bragg-Gresham,J.L., van Dongen,J., Huffman,J.E.,  
803 Ahluwalia,T.S., Cadby,G., Eklund,N., Eriksson,J., *et al.* (2016) A principal component  
804 meta-analysis on multiple anthropometric traits identifies novel loci for body shape. *Nat.*  
805 *Commun.*, **7**, 13357.  
806



807 **Table 1. Direct RFX7 target genes.** Set of 57 direct RFX7 target genes identified as bound  
 808 by RFX7 and down-regulated upon RFX7 knockdown in at least two of the three cell lines  
 809 (Figure 4D). Genes within the 19-gene-set used for survival analyses are marked bold.

|                     |                     |                       |                       |                        |
|---------------------|---------------------|-----------------------|-----------------------|------------------------|
| <i>ABAT</i>         | <i>DIP2A</i>        | <i>KLF9</i>           | <i>PTMS</i>           | <i>TOB2</i>            |
| <i>ARL15</i>        | <i>DOLPP1</i>       | <i>MAF</i>            | <i>RAB40B</i>         | <i>TOP2B</i>           |
| <i>ATRX</i>         | <i>DSE</i>          | <b><i>MXD4</i></b>    | <i>RAP2A</i>          | <b><i>TP53INP1</i></b> |
| <i>CABIN1</i>       | <i>EMC9</i>         | <i>NRSN2-AS1</i>      | <i>REV3L</i>          | <i>TSC22D1</i>         |
| <i>CAT</i>          | <i>FAM111A</i>      | <i>OTUD5</i>          | <b><i>RFX5</i></b>    | <b><i>TSPYL1</i></b>   |
| <b><i>CCND1</i></b> | <i>FAM214A</i>      | <b><i>PDCD4</i></b>   | <i>RMND5A</i>         | <b><i>TSPYL2</i></b>   |
| <b><i>CCNG2</i></b> | <i>HNRNPUL2</i>     | <i>PI4K2A</i>         | <i>RPS6KA5</i>        | <i>UBE2H</i>           |
| <i>CDK4</i>         | <i>INTS3</i>        | <b><i>PIK3IP1</i></b> | <b><i>SESN3</i></b>   | <i>XRCC1</i>           |
| <i>CIC</i>          | <b><i>IP6K2</i></b> | <b><i>PIK3R3</i></b>  | <b><i>SLC43A2</i></b> | <b><i>YPEL2</i></b>    |
| <i>CKAP2</i>        | <b><i>JUNB</i></b>  | <b><i>PLCXD2</i></b>  | <i>SOX12</i>          |                        |
| <i>CKS2</i>         | <i>KDM4A</i>        | <b><i>PNRC1</i></b>   | <i>SOX4</i>           |                        |
| <i>DDIT4</i>        | <i>KDM6B</i>        | <i>PRKCZ</i>          | <b><i>TOB1</i></b>    |                        |

810

811 **Figure 1. The p53 target RFX7 mediates p53-dependent gene activation. (A)** Our previous  
 812 meta-analysis identified 1392 genes as frequently up-regulated by p53 (*p53 Expression Score*  
 813  $\geq 5$ ). Out of these genes, 311 displayed frequent p53 binding within 2.5kb of their TSS and  
 814 represent high-probability direct p53 targets (20). Transcription factors enriched for binding  
 815 within 500 bp upstream from the TSS of the remaining 1081 genes were identified using  
 816 publicly available ChIP-seq data. ChIP-seq datasets with a normalized enrichment score  
 817 (NES) > 2.5 are displayed. **(B)** The p53-dependent regulation of RFX family encoding genes  
 818 across 20 datasets from a meta-analysis (20). Genes were identified as significantly up-  
 819 regulated (green; +1), down-regulated (red; -1), or not significantly differentially regulated  
 820 (white; 0). The *p53 Expression Score* represents the summary across all 20 datasets. **(C)**  
 821 Genome browser snapshot displaying publicly available p53 binding signals from Nutlin-3a  
 822 treated U2OS and HCT116 cells at the *RFX7* gene locus. Red arrows indicate two p53 binding

823 signals in *RFX7* intron1, one located 5' (*RFX7\_5'*) and one 3' (*RFX7\_3'*). **(D)** RT-qPCR data  
824 of selected direct *RFX7* targets in U2OS cells. Normalized to siControl#1 DMSO. *ACTR10*  
825 served as negative control. *TP53*, *RFX1*, *RFX5*, and *RFX7* are shown as knockdown controls.  
826 *CDKN1A* is a positive control for p53 induction by Nutlin-3a. Mean and standard deviation is  
827 displayed. Statistical significance obtained through a two-sided unpaired t-test, n = 9 replicates  
828 (3 biological with 3 technical each). **(E)** Western blot analysis of *RFX7*, p53, *PDCD4*, *PIK3IP1*,  
829 and actin (loading control) levels in U2OS cells transfected with siControl, si*RFX7*, or si*TP53*  
830 and treated with Nutlin-3a or dimethyl sulfoxide (DMSO) solvent control. **(F)** *RFX7* and p53  
831 ChIP-qPCR of selected *RFX7* targets in Nutlin-3a and DMSO control-treated U2OS cells.  
832 *GAPDH* served as negative control. *MDM2* served as positive control for p53 binding. Mean  
833 and standard deviation is displayed. Statistical significance obtained through a two-sided  
834 unpaired t-test, n = 3 technical replicates.

835

836 **Figure 2. The direct p53 target RFX7 functions in numerous cell types. (A)** ChIP-qPCR of  
837 p53 binding to *GAPDH* (negative control), *MDM2* (positive control), and the 5' (*RFX7\_5'*) and  
838 3' (*RFX7\_3'*) sites in *RFX7* intron1 from U2OS, HCT116, and RPE-1 cells treated with Nutlin-  
839 3a or DMSO solvent control. Statistical significance obtained through a two-sided unpaired t-  
840 test, n = 3 technical replicates. **(B)** RT-qPCR data of *PDCD4*, *PIK3IP1*, *MXD4*, and *PNRC1* in  
841 HCT116 and RPE-1 cells. Normalized to *ACTR10* negative control and siControl DMSO  
842 sample. Mean and standard deviation is displayed. Statistical significance obtained through a  
843 two-sided unpaired t-test, n = 6 replicates (2 biological with 3 technical each). *TP53* and *RFX7*  
844 are shown as knockdown controls. *CDKN1A* is a positive control for p53 induction by Nutlin-  
845 3a. **(C)** Western blot analysis of *RFX7*, p53, *PDCD4*, *PIK3IP1*, and actin (loading control) levels  
846 in HCT116 and RPE-1 cells transfected with siControl, si*RFX7*, or si*TP53* and treated with  
847 Nutlin-3a or DMSO solvent control.

848

849 **Figure 3. The DNA binding landscape of RFX7. (A)** Number of *RFX7* ChIP-seq peaks  
850 identified in Nutlin-3a-treated U2OS, HCT116, and RPE-1 cells. **(B)** Average vertebrate

851 PhastCons conservation score at the 120 common RFX7 binding sites. **(C)** CEAS Enrichment  
852 on annotation analysis (38) for the 120 common RFX7 peaks compared to the human genome  
853 hg38. **(D)** Top motifs identified by *de novo* motif analysis using HOMER under the 120 peaks  
854 commonly identified in all three cell lines. **(E)** Mean RFX7 occupancy (ChIP-seq read counts)  
855 at the 120 common RFX7 binding sites. **(F)** Genome browser images displaying RFX7 ChIP-  
856 seq signals and predicted X-boxes at the *PNRC1* and *MXD4* gene loci. **(G)** Transcription factor  
857 ChIP-seq peak sets from CistromeDB that overlap significantly with the 120 common RFX7  
858 binding sites. **(H)** Comparison of known X-box motifs from RFX family members with the X-  
859 box we identified for RFX7. Known motifs were obtained from the HOMER motif database. **(I)**  
860 The overlap of the 120 common RFX7 binding sites with 7877 RFX5 binding sites supported  
861 by at least 5 out of 10 ChIP-seq datasets.

862

863 **Figure 4. The RFX7-regulated transcriptome. (A)** TPM (Transcripts Per Kilobase Million)  
864 expression values of *RFX1*, *RFX5*, and *RFX7* obtained from RNA-seq analysis from U2OS,  
865 HCT116, and RPE-1 cells treated with Nutlin-3a or DMSO solvent control. Statistical  
866 significance data from DESeq2 analysis. **(B)** Number of genes significantly (FDR < 0.01) up  
867 ( $\log_2FC \geq 0.25$ ; red venn diagrams) or down-regulated ( $\log_2FC \leq -0.25$ ; green venn diagrams)  
868 following siRFX7 treatment in DMSO (bottom venn diagrams) and Nutlin-3a-treated (upper  
869 venn diagrams) U2OS, HCT116, and RPE-1 cells. **(C)** Top 5 transcription factors and binding  
870 motifs enriched among genes significantly up or down-regulated following RFX7 depletion in  
871 at least two Nutlin-3a-treated cell lines. **(D)** Heatmap of RNA-seq data for direct RFX7 target  
872 genes that bind RFX7 within 5 kb from their TSS according to ChIP-seq data and are  
873 significantly (FDR < 0.01) down-regulated ( $\log_2FC \leq -0.25$ ) following RFX7 depletion in Nutlin-  
874 3a treated U2OS, HCT116, and RPE-1 cells. Significant (FDR < 0.01) p53-dependent  
875 regulation is indicated at the left. Asterisks (\*) indicate conserved Rfx7-dependent expression  
876 in mouse spleen or bone marrow (17) (Supplementary Table 3). Violin plots correspond to the  
877 heatmaps and display the mean Z-score of all these genes for the different treatment  
878 conditions. The median is indicated by a black line. Statistical significance obtained using a

879 two-sided paired t-test.

880

881 **Figure 5. RFX7 up-regulates its target genes in response to stress. (A)** The p53-  
882 dependent regulation of direct RFX7 target genes (Table 1) across 20 datasets from a meta-  
883 analysis (20). Genes were identified as significantly up-regulated (green; +1), down-regulated  
884 (red; -1), or not significantly differentially regulated (white; 0). The *p53 Expression Score*  
885 represents the summary across all 20 datasets. No meta-analysis data was available for  
886 *NRSN2-AS1* and *HNRNPUL2*. **(B)** RT-qPCR data from U2OS cells depleted for RFX7 or p53  
887 and treated with DMSO control, Nutlin-3a (N3A), Actinomycin D (AD), and Doxorubicin (Dox).  
888 RT-qPCR data normalized to *ACTR10* and siControl DMSO levels. Mean and standard  
889 deviation is displayed. Statistical significance of RT-qPCR data obtained through a two-sided  
890 unpaired t-test, n = 6 replicates (2 biological with 3 technical each).

891

892 **Figure 6. RFX7 limits cell viability, and RFX7 target gene expression correlates with**  
893 **good prognosis in cancer and cell differentiation. (A)** Cell viability data from depmap.org  
894 (51). DEMETER2 dependency scores (52) are based on RNAi mediated knockdown of RFX7  
895 in 343 cell lines. Top panel displays data for all 343 cell lines and bottom panel displays groups  
896 of cell lines that show DEMETER2 scores significantly different to all other cell lines. Groups  
897 are based on tissue origin. Negative dependency scores reflect decreased cell viability upon  
898 loss of the target gene, while positive scores indicate increased cell viability. **(B)** Kaplan-Meier  
899 plot of patients from the TCGA pan-cancer cohort. Patients were grouped into low, medium,  
900 and high based on the rank expression of 19 direct RFX7 target genes that display a *p53*  
901 *Expression Score* > 5 (20). Statistical significance obtained through the Cox proportional  
902 hazards (PH) model (Cox likelihood ratio test variable). To correct for major confounding  
903 factors, cancer type, gender, and age were included into the multivariate regression analysis.  
904 Statistical significance of the rates of occurrence of events over time between the groups was  
905 obtained using the fitted Cox PH model (Cox likelihood ratio test groups). Complementary data  
906 displayed in Supplementary Figure 3. **(C)** Gene set enrichment analysis (GSEA) of 57 direct

907 RFX7 target genes in human p53-negative HL-60 promyelocytes differentiated into  
908 macrophages or neutrophils (upper panels) (47), human umbilical cord blood-derived  
909 unrestricted somatic stem cells (USSC) differentiated into neuronal-like cells (48) and human  
910 pluripotent stem cells (PSC) differentiated into lung alveolar cells (bottom panels) (49).

911

912 **Figure 7. RFX7 target gene expression correlates significantly positive with good**  
913 **prognosis in 11 cancer types.** Kaplan-Meier plots of patients from TCGA cohorts. Patients  
914 were grouped into low, medium, and high based on the rank expression of 19 direct RFX7  
915 target genes that display a *p53 Expression Score* > 5 (20). 11 out of 33 cancer types are  
916 displayed that show a significantly (Cox likelihood ratio test variable < 0.05 and Cox likelihood  
917 ratio test group low vs high < 0.1) better prognosis when the expression of the RFX7 targets  
918 is higher. Only one cancer type (TCGA-COAD) showed a significantly poorer prognosis.  
919 Statistical significance obtained through the Cox proportional hazards (PH) model (Cox test  
920 variable). To correct for major confounding factors, gender and age were included into the  
921 multivariate regression analysis. Statistical significance of the rates of occurrence of events  
922 over time between the groups was obtained using the fitted Cox PH model (Cox test groups).

923

924 **Figure 8. RFX7 sensitizes to Doxorubicin through promoting apoptosis. (A)** WST-1 assay  
925 of U2OS and HCT116 cells challenged with different concentrations of Doxorubicin. Mean and  
926 standard deviation is displayed. Statistical significance between siControl and siRFX7 obtained  
927 through a Sidak-corrected two-way ANOVA test, n = 11 (U2OS) or 9 (HCT116) biological  
928 replicates. **(B)** Clonogenic assay of HCT116 cells challenged with different concentrations of  
929 Doxorubicin (left) and complementary brightfield images (right). **(C)** Annexin V assay of  
930 HCT116 cells transfected with siControl, siTP53, or siRFX7 and treated with indicated  
931 concentrations of Doxorubicin. Viable cells (negative for Annexin V and PI), early apoptotic  
932 cells (positive for Annexin V, negative for PI), and late apoptotic cells (positive for Annexin V  
933 and PI) were quantified through flow cytometry. Relative numbers of 50,000 cells from n = 4  
934 biological replicates are displayed. Mean and standard deviation is displayed. Statistical

935 significance between siControl and siRFX7 obtained through a two-sided paired t-test.

936

937 **Supplementary Figure 1. (A)** UCSC genome browser images displaying publicly available  
938 p53 binding signals from Nutlin-3a treated U2OS (42) and HCT116 (43) cells (obtained from  
939 CistromeDB (40)) at the *RFX7*, *RFX5*, and *RFX1* gene loci. **(B)** BETA analysis (39) of RFX7  
940 *trans*-activator/repressor function using ChIP-seq and RNA-seq data from U2OS, HCT116,  
941 and RPE-1 cells. Based on a correlation between binding proximity to a gene's TSS and the  
942 gene's differential expression, the BETA analysis tests whether a given TF functions as an  
943 activator and/or a repressor of gene expression. Data from two out of three cell lines  
944 significantly identified RFX7 to function as a *trans*-activator.

945

946 **Supplementary Figure 2.** Heatmap of genes significantly (FDR < 0.01) down-regulated  
947 ( $\log_2FC < -0.25$ ) by siRFX7, up-regulated ( $\log_2FC > 0.25$ ) by Nutlin-3a (N3A) in siControl  
948 treated cells, not bound by RFX7 but with reduced Nutlin-3a-dependent regulation in siRFX7  
949 treated cells. The top 100 genes are displayed ranked by the difference of mean Z-score Nutlin-  
950 3a/DMSO difference between siRFX7 and siControl treated cells. *RFX7* is displayed as  
951 knockdown control. *CDKN1A* and *MDM2* are direct p53 targets not affected by RFX7.

952

953 **Supplementary Figure 3.** Distribution of **(A)** gender, **(B)** age, and **(C)** cancer type in the  
954 patient groups. Complement to Figure 6C. **(A)** Statistical significance tested through a pairwise  
955 non-parametric Wilcoxon test.

956



**A**

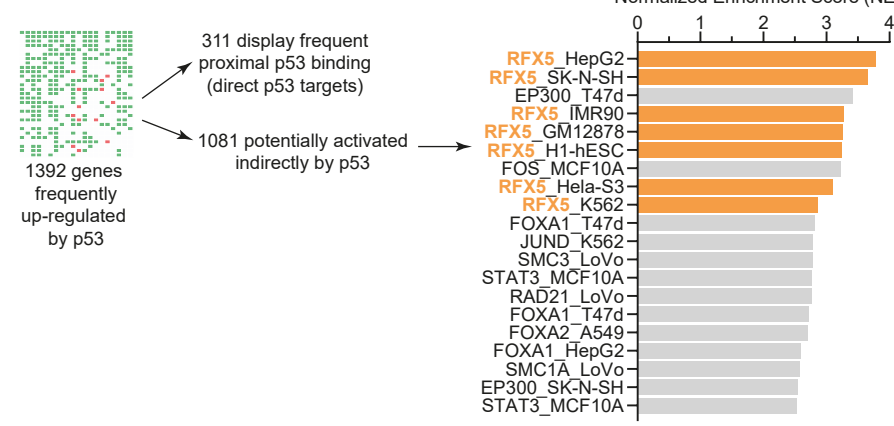

**B**

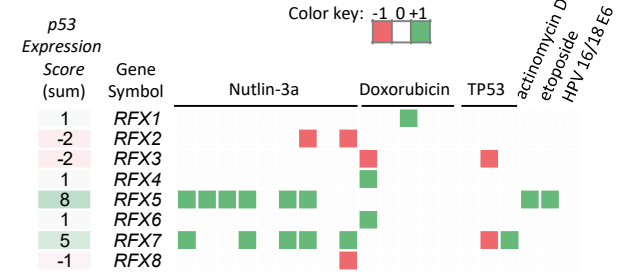

**C**

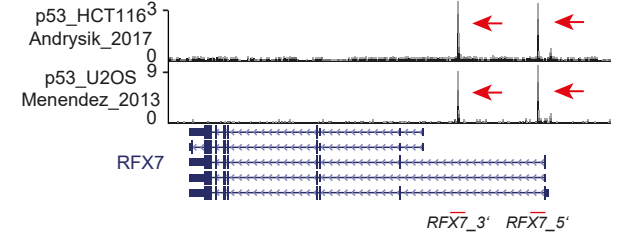

**E**

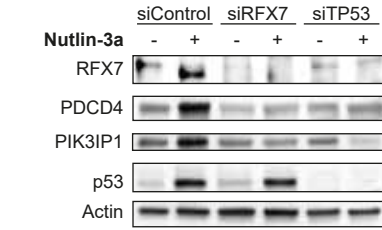

**F**

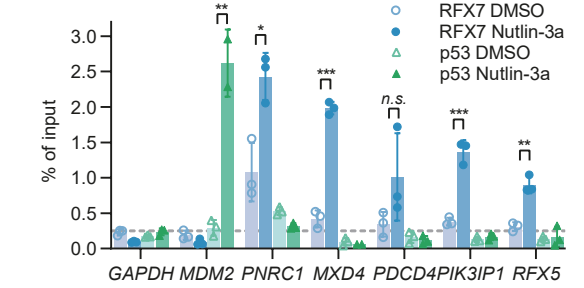

**D**

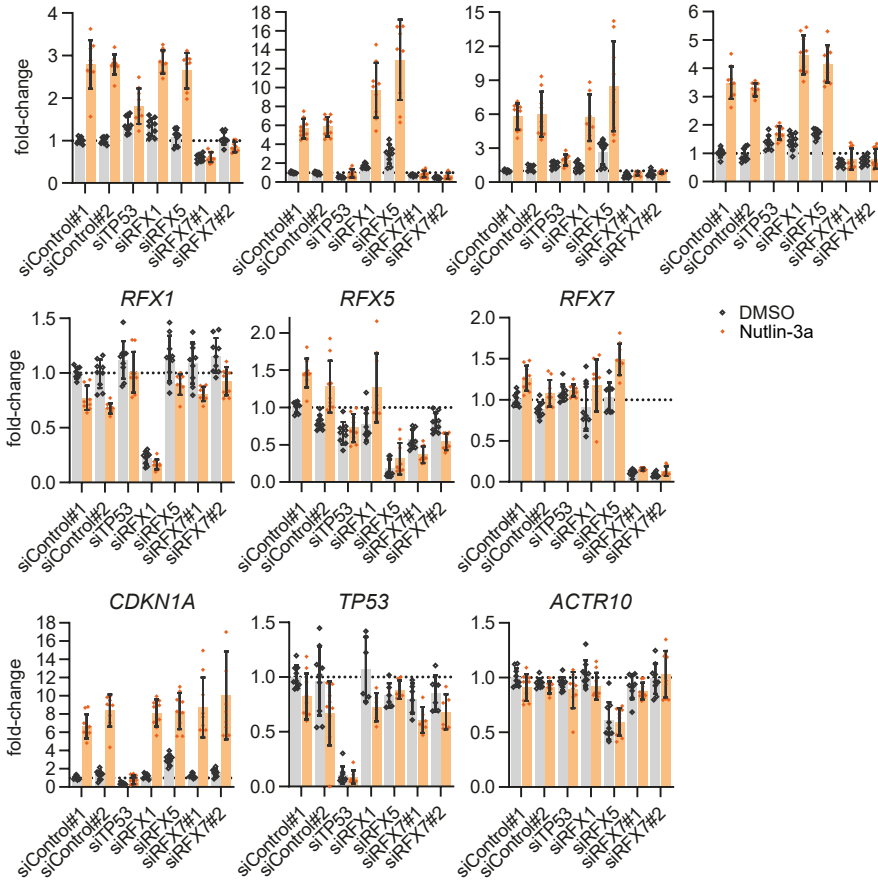

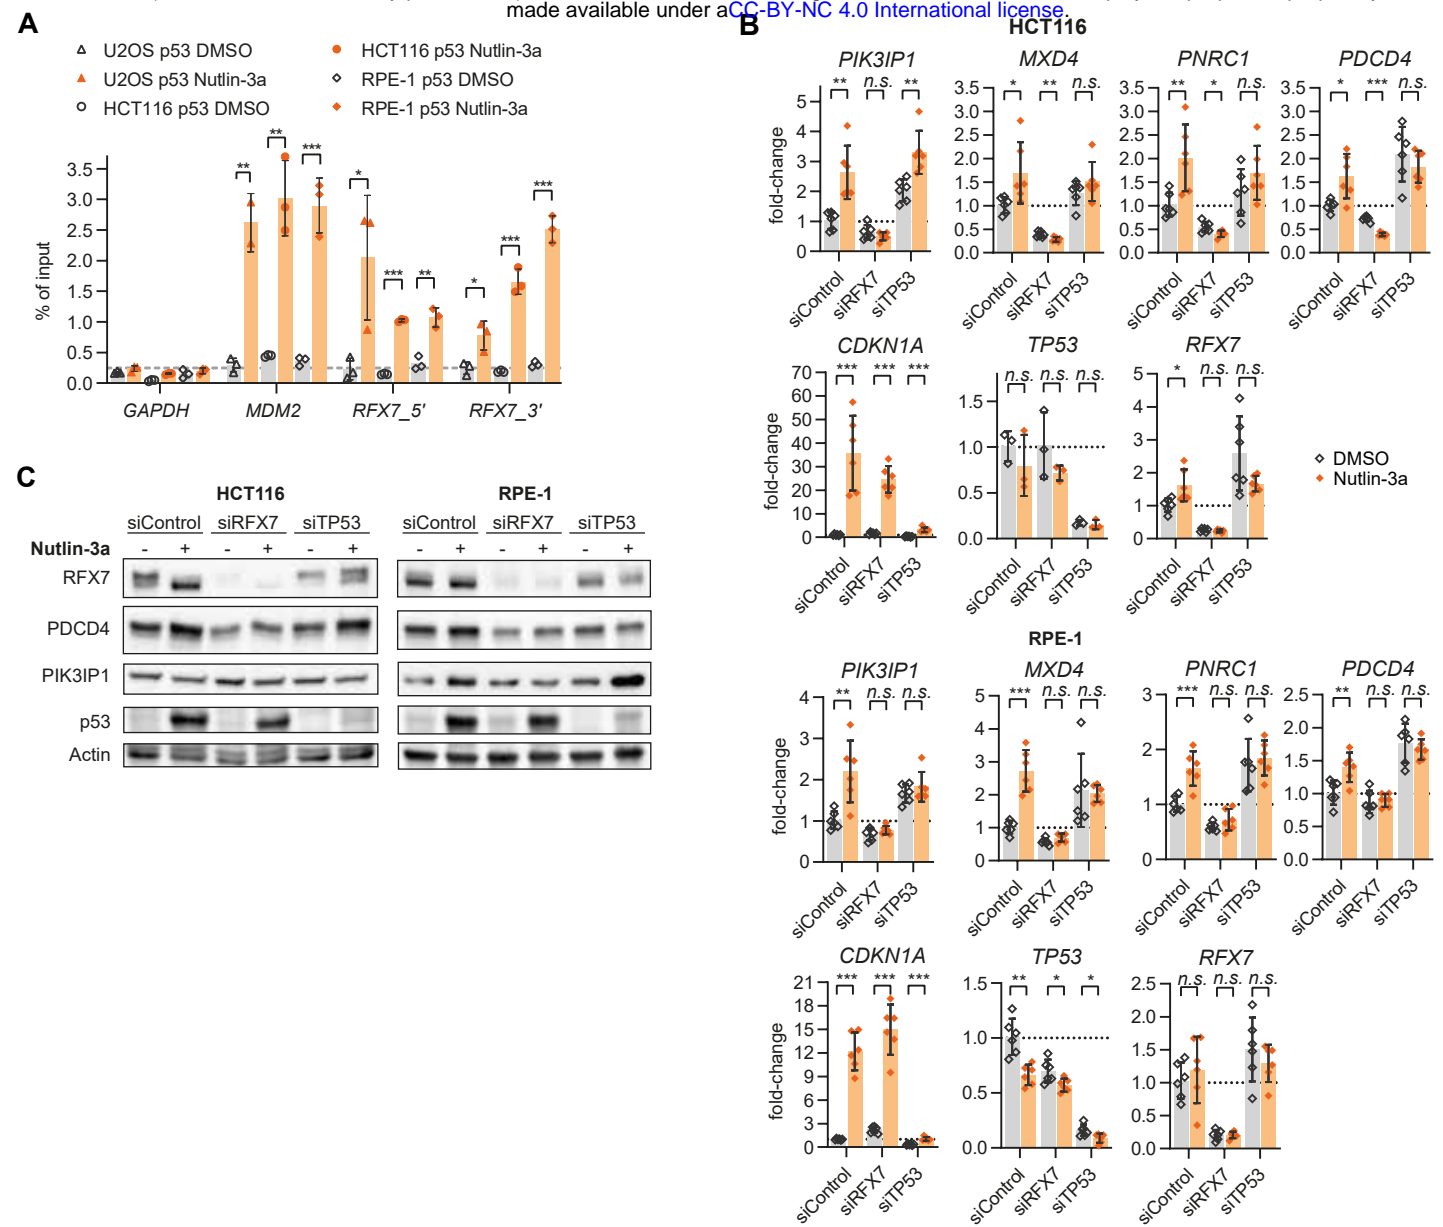

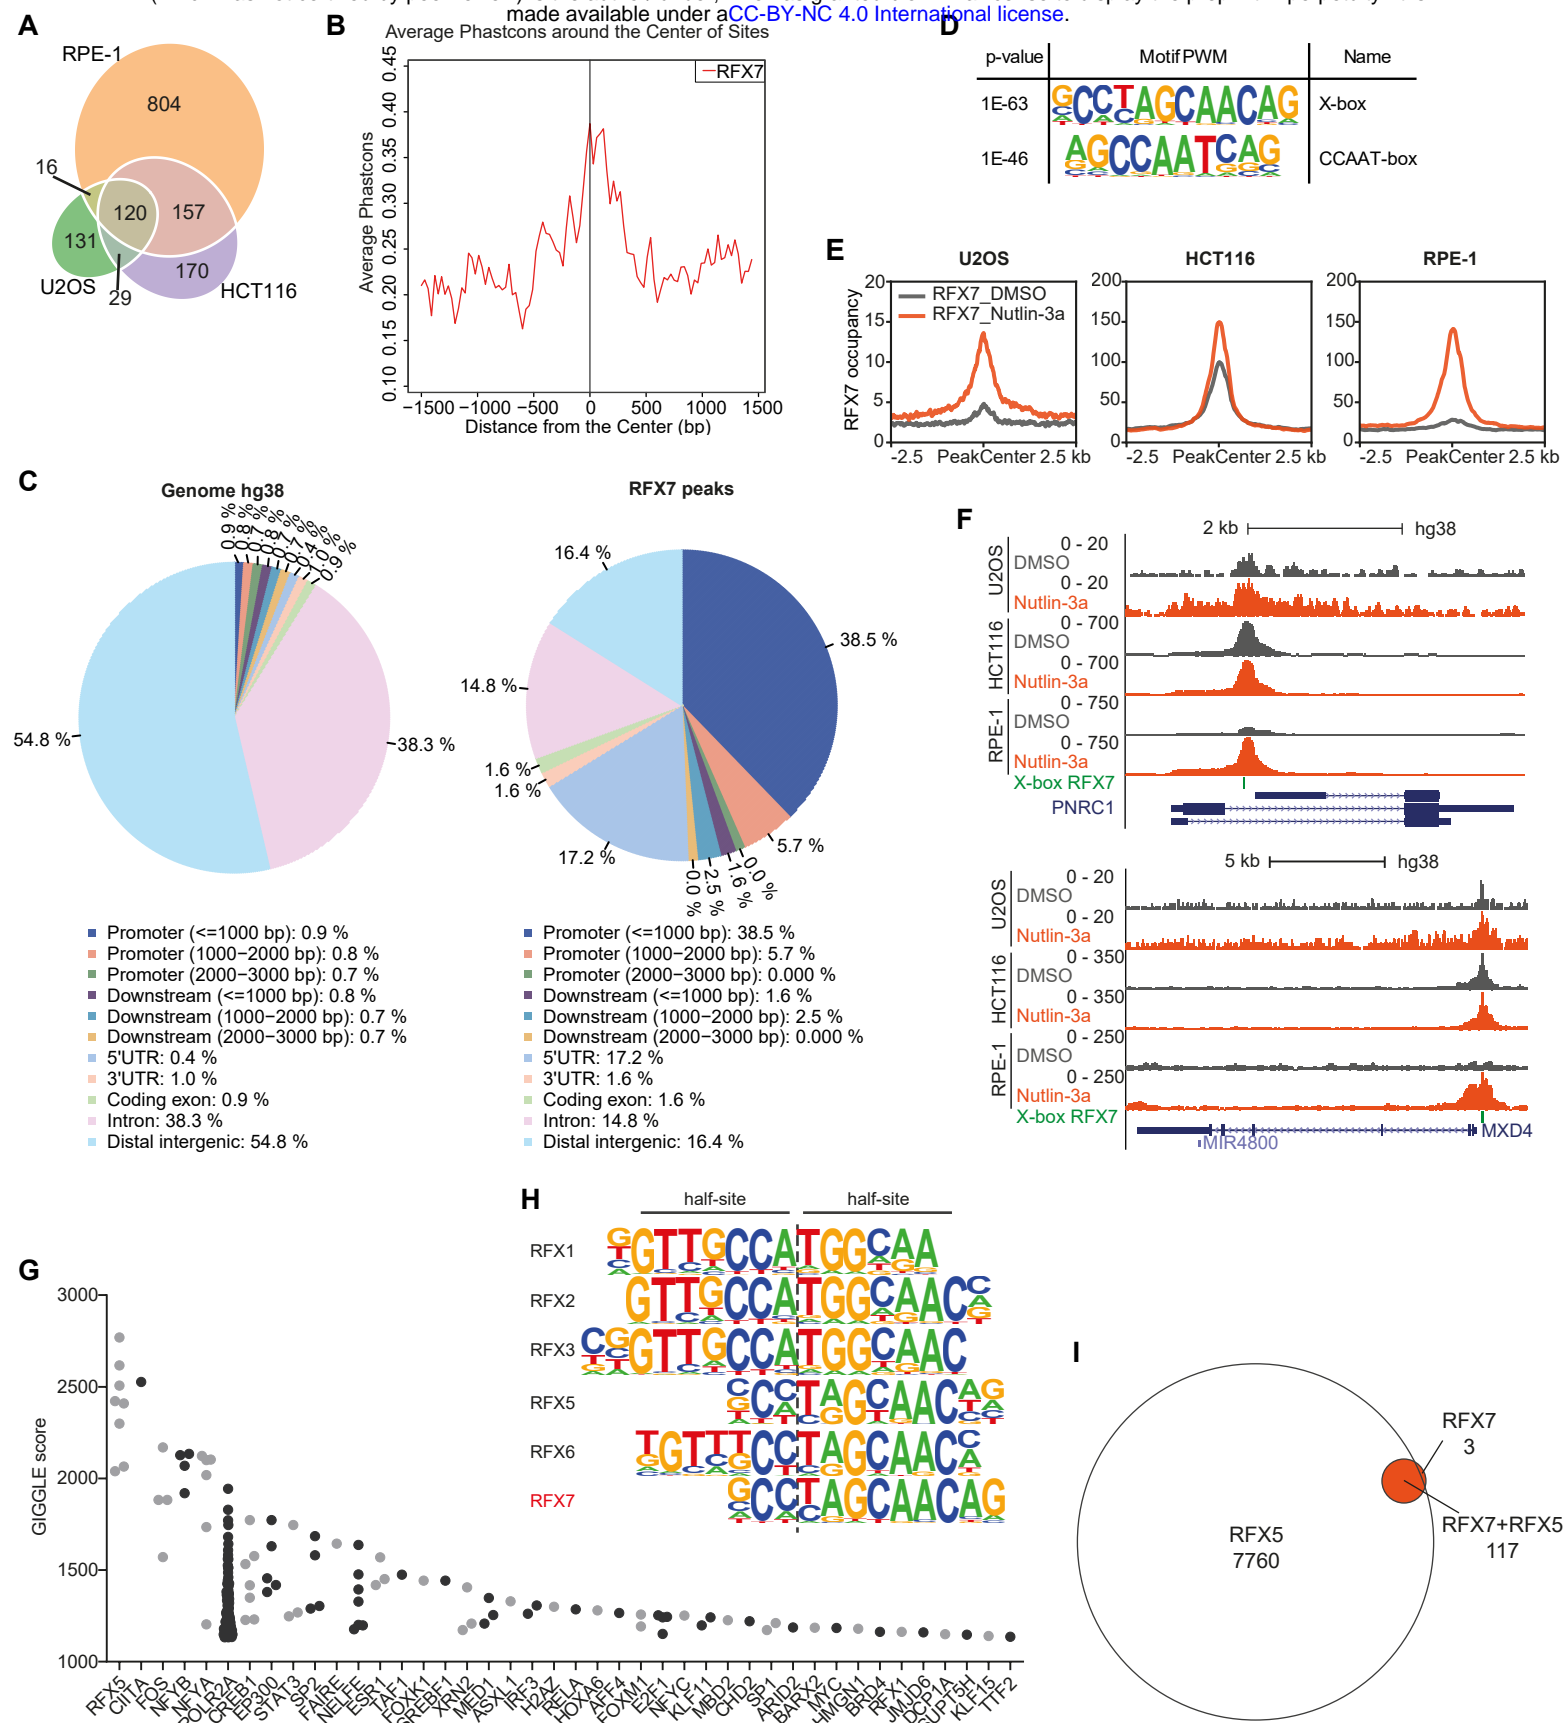



**A**

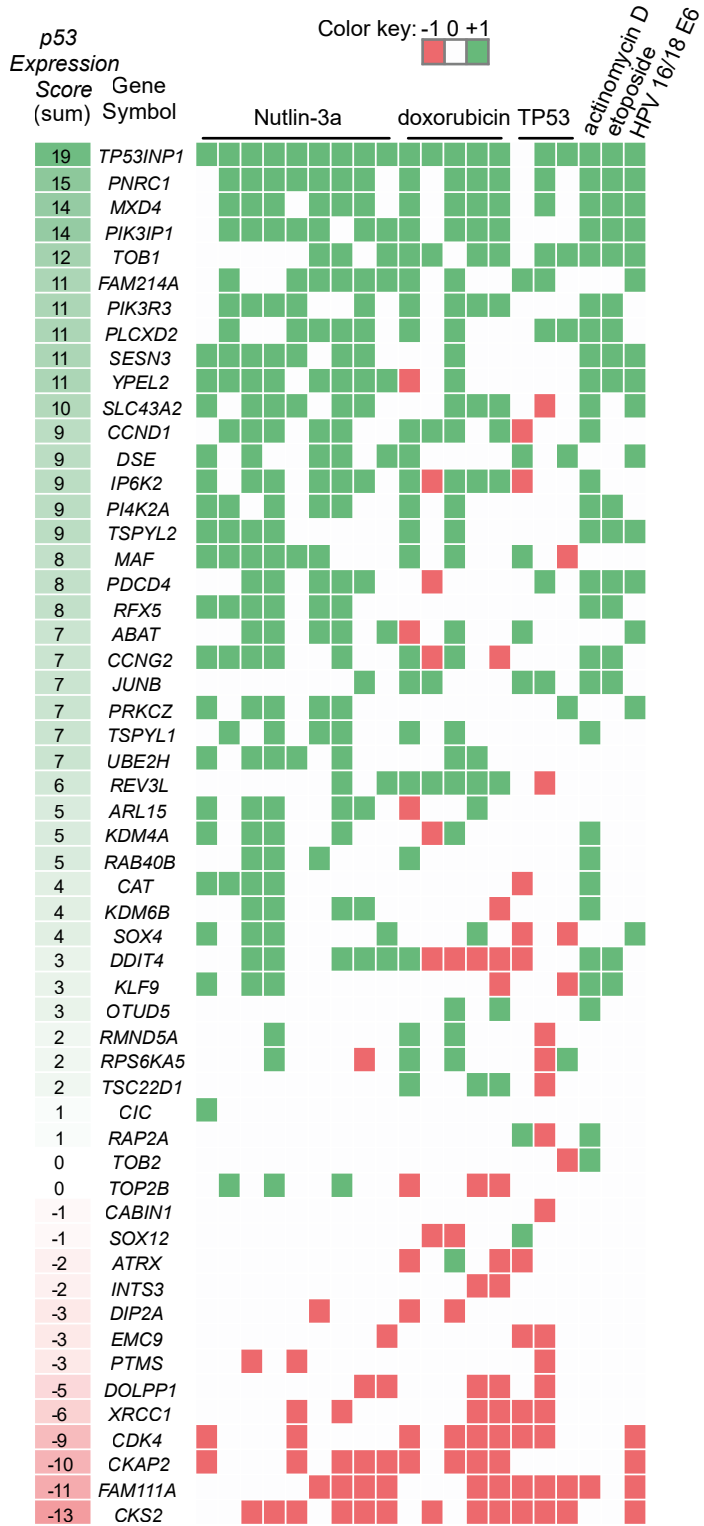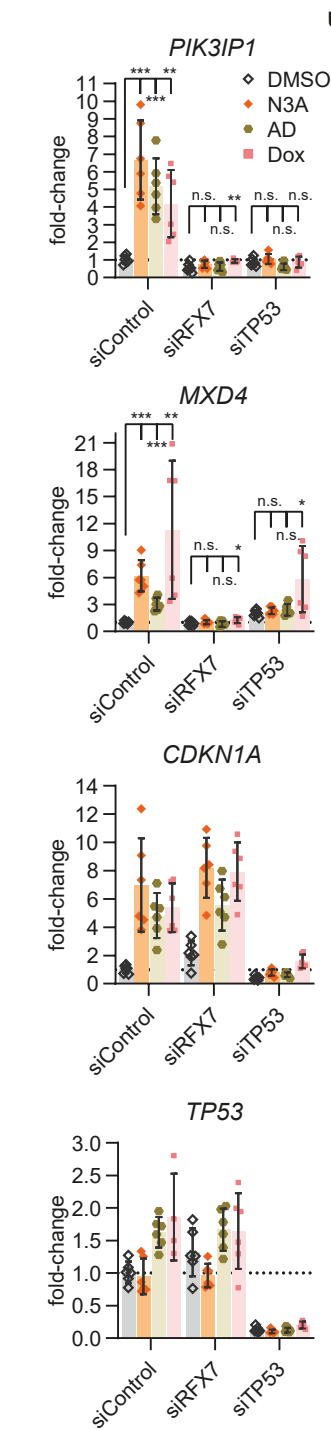

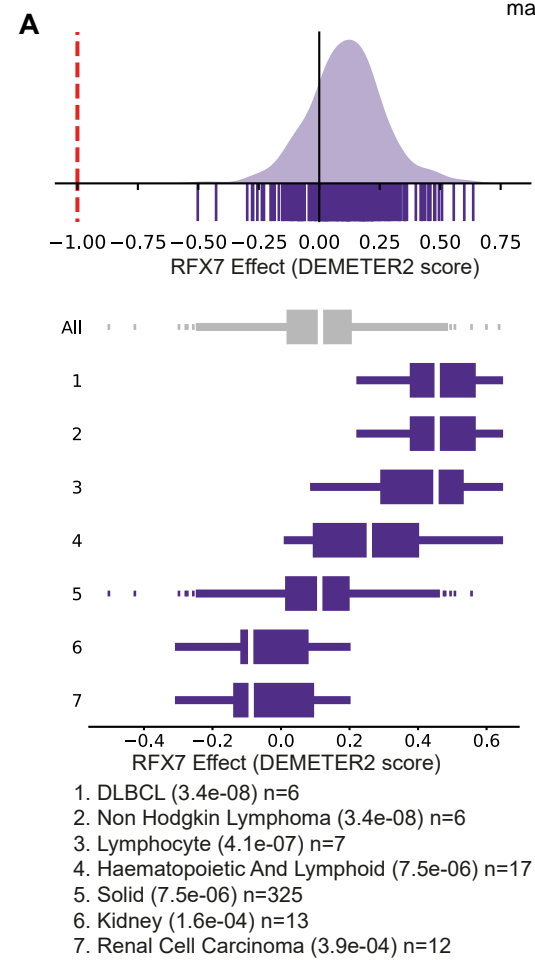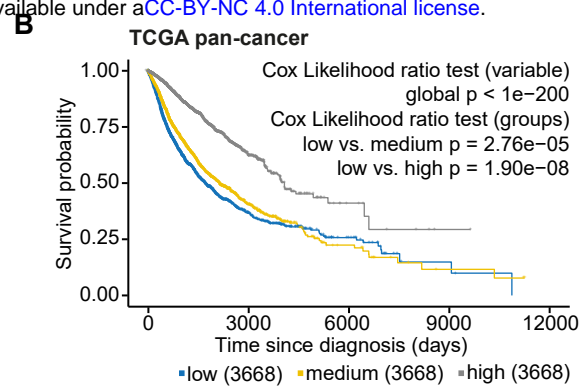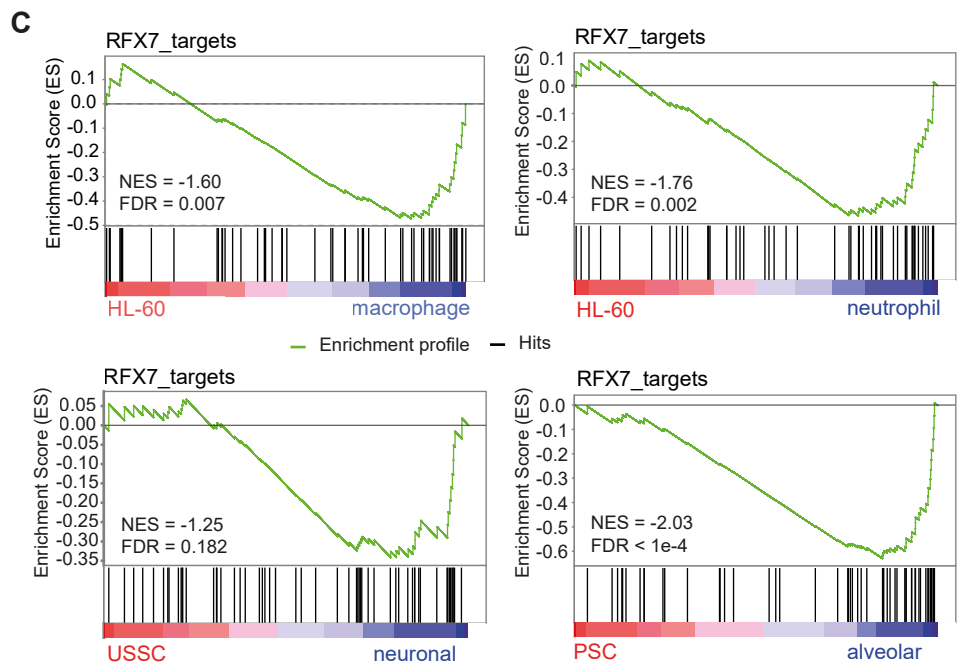



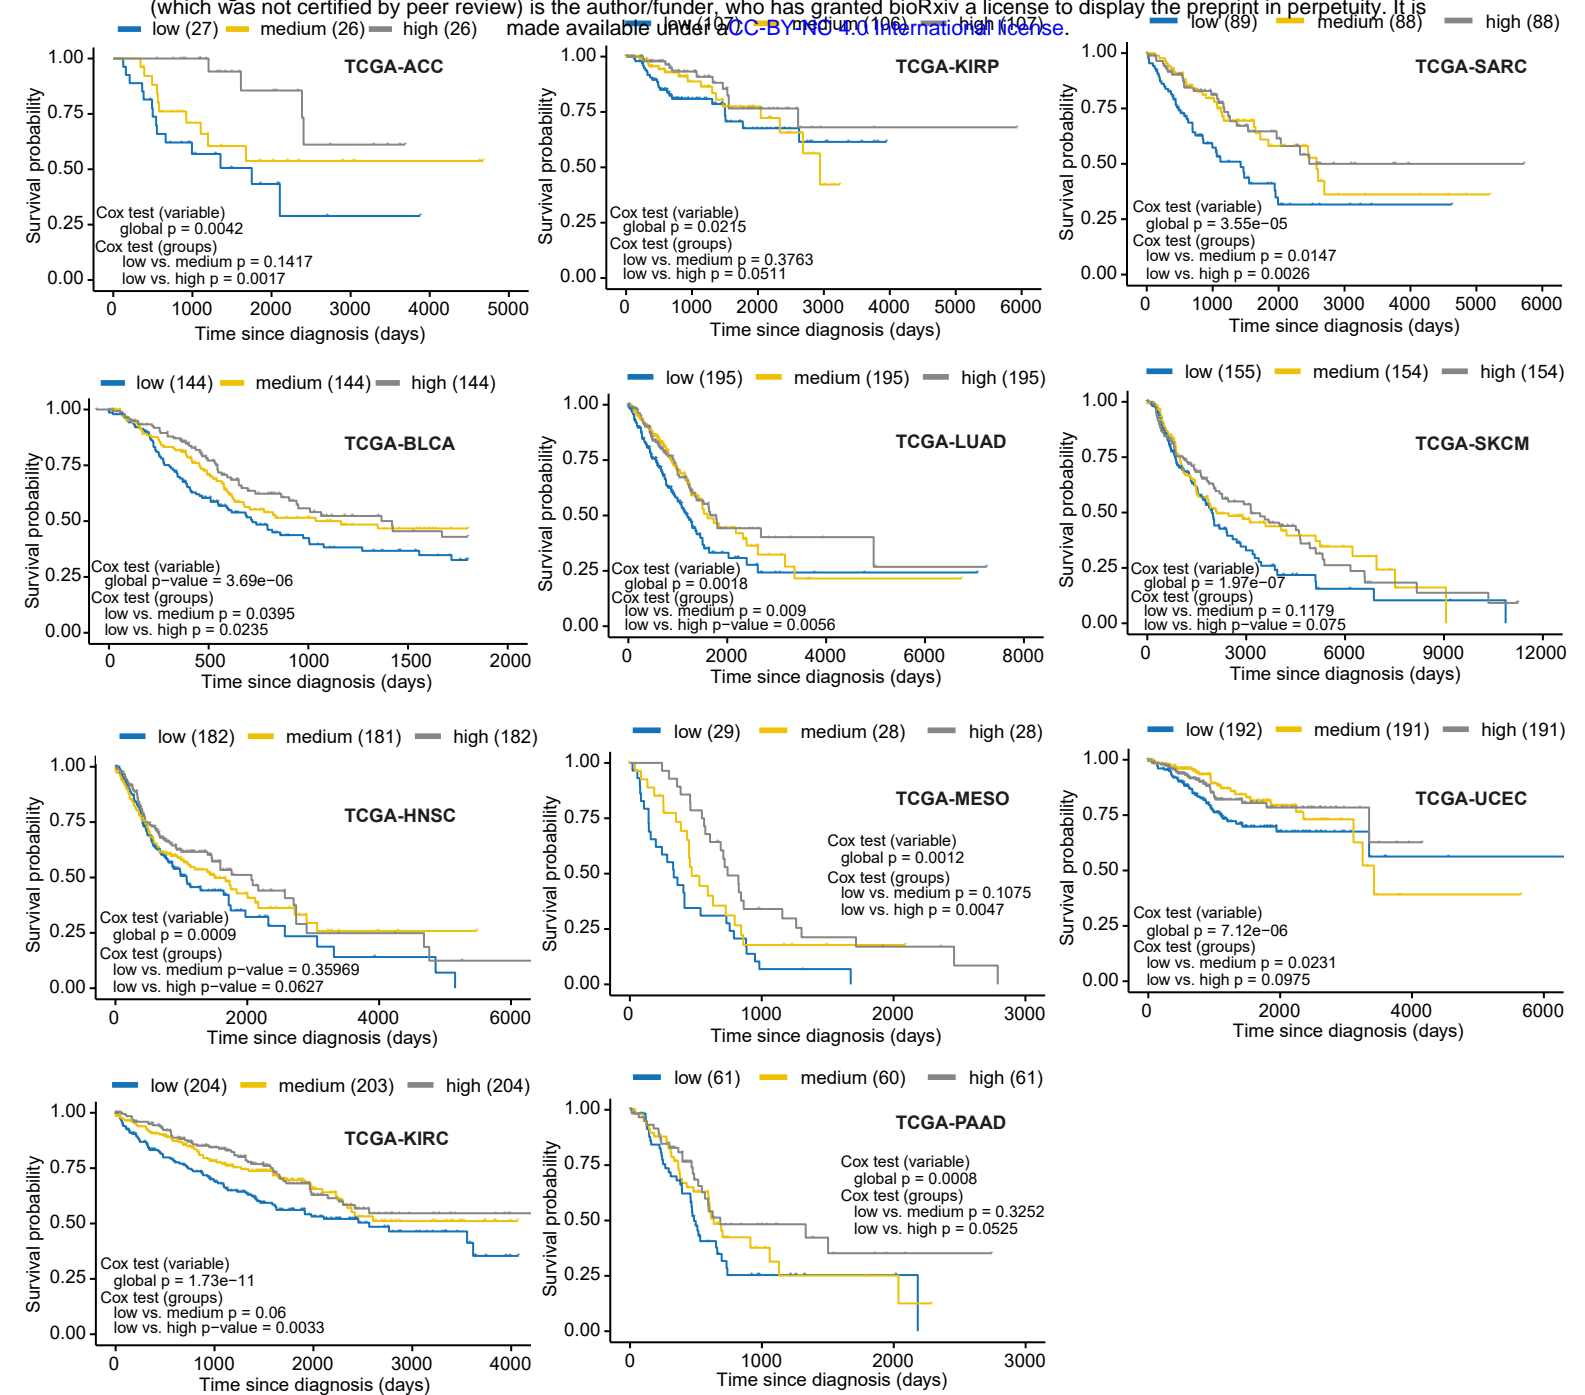

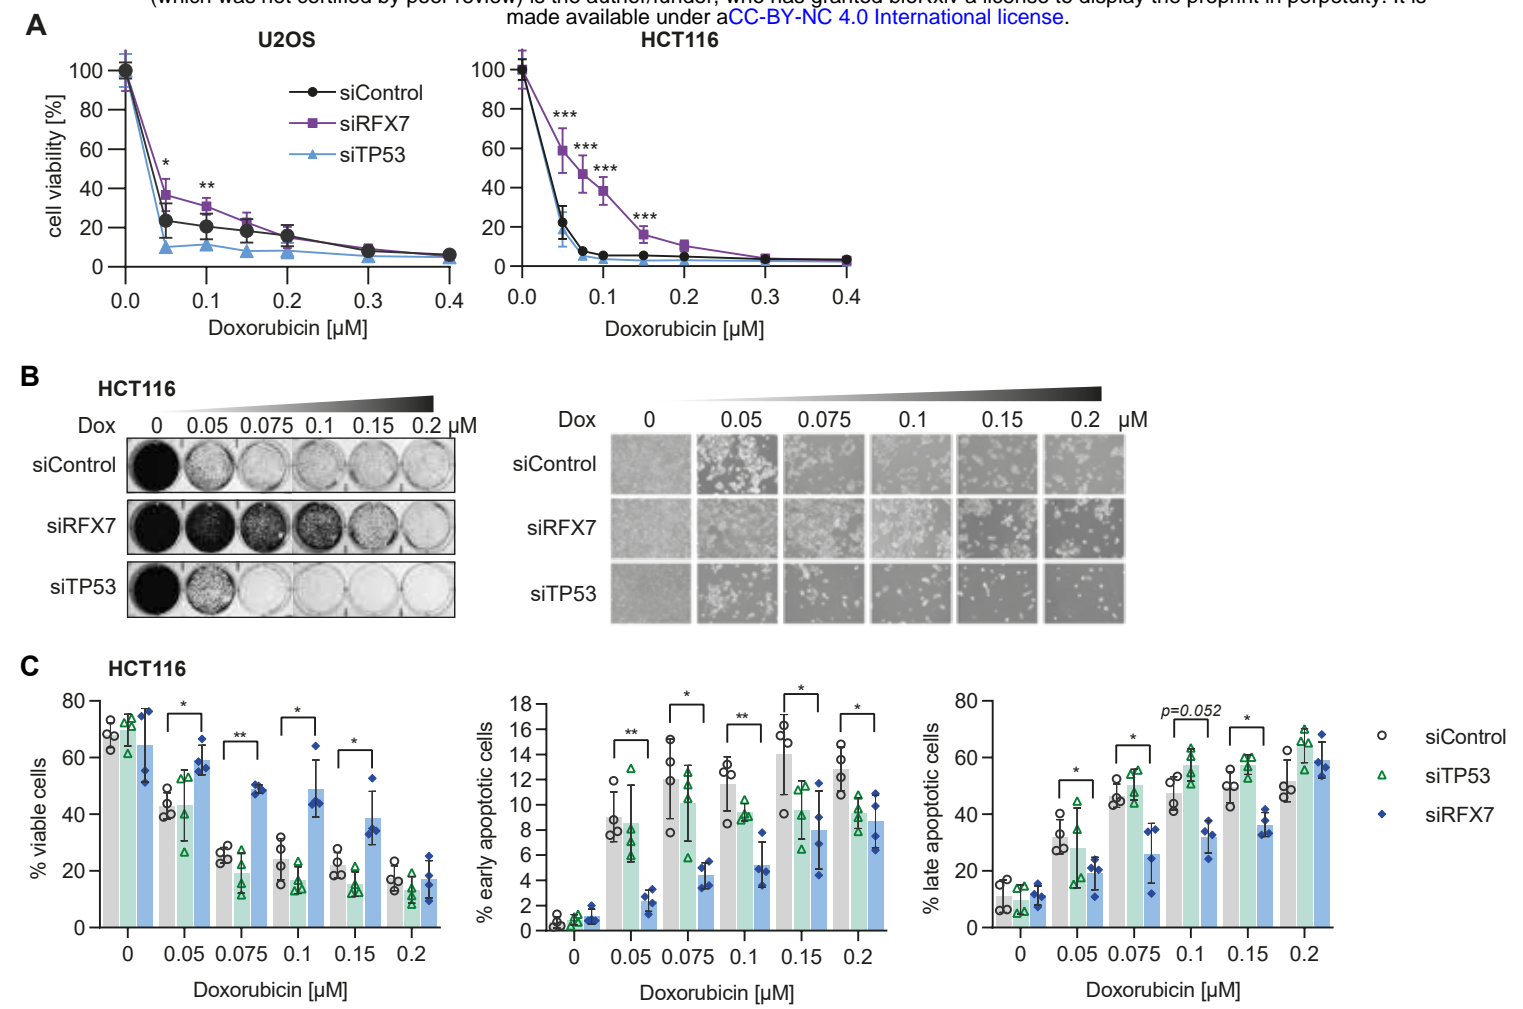

Source: https://biorxiv.org/content/10.1101/2021.03.25.436917v1.full.pdf
